# Supplementary material for: Determination of piperaquine concentration in human plasma and the correlation of capillary versus venous plasma concentrations
Source: PubMed Central journal article supplement (PMC7259774; doi:10.1371/journal.pone.0233893), 2020-05-29

|    | Sample Name | Sample Type | Acquisition Date    | Vial Position | File Name           | Analyte Peak Area (counts) | Analyte Concentration | IS Peak Area (counts) | Use Record                          | Record Mode              | Calculated Concentration | Relative Retention |
|----|-------------|-------------|---------------------|---------------|---------------------|----------------------------|-----------------------|-----------------------|-------------------------------------|--------------------------|--------------------------|--------------------|
| 19 | STD1        | Sta         | 4/8/2015 3:43:37 PM | 13            | 2015 4_07PQvalid3_V | 1.29e+004                  | 10.0                  | 3.73e+00              | <input checked="" type="checkbox"/> | <input type="checkbox"/> | 9.94                     | 1.04               |
| 20 | STD2        | Sta         | 4/8/2015 3:47:12 PM | 14            | 2015 4_07PQvalid3_V | 2.63e+004                  | 25.0                  | 3.45e+00              | <input checked="" type="checkbox"/> | <input type="checkbox"/> | 24.9                     | 1.05               |
| 21 | STD3        | Sta         | 4/8/2015 3:50:47 PM | 15            | 2015 4_07PQvalid3_V | 5.06e+004                  | 50.0                  | 3.48e+00              | <input checked="" type="checkbox"/> | <input type="checkbox"/> | 49.8                     | 1.04               |
| 22 | STD4        | Sta         | 4/8/2015 3:54:22 PM | 16            | 2015 4_07PQvalid3_V | 9.82e+004                  | 100.                  | 3.56e+00              | <input checked="" type="checkbox"/> | <input type="checkbox"/> | 96.5                     | 1.05               |
| 23 | STD5        | Sta         | 4/8/2015 3:57:57 PM | 17            | 2015 4_07PQvalid3_V | 2.54e+005                  | 250.                  | 3.46e+00              | <input checked="" type="checkbox"/> | <input type="checkbox"/> | 261.                     | 1.04               |
| 24 | STD6        | Sta         | 4/8/2015 4:01:37 PM | 18            | 2015 4_07PQvalid3_V | 5.35e+005                  | 500.                  | 3.72e+00              | <input checked="" type="checkbox"/> | <input type="checkbox"/> | 513.                     | 1.04               |
| 25 | STD7        | Sta         | 4/8/2015 4:05:17 PM | 19            | 2015 4_07PQvalid3_V | 9.77e+005                  | 1000.                 | 3.57e+00              | <input checked="" type="checkbox"/> | <input type="checkbox"/> | 980.                     | 1.04               |
| 26 | Dbk         | Unk         | 4/8/2015 4:08:57 PM | 11            | 2015 4_07PQvalid3_V | 5.26e+003                  | N/A                   | 0.00e+00              | <input type="checkbox"/>            | <input type="checkbox"/> | #DIV/0                   | 0.00               |
| 27 | LOQ1        | Qua         | 4/8/2015 4:12:32 PM | 20            | 2015 4_07PQvalid3_V | 1.50e+004                  | 10.0                  | 3.81e+00              | <input checked="" type="checkbox"/> | <input type="checkbox"/> | 11.7                     | 1.04               |
| 28 | LOQ2        | Qua         | 4/8/2015 4:16:12 PM | 21            | 2015 4_07PQvalid3_V | 1.38e+004                  | 10.0                  | 3.71e+00              | <input checked="" type="checkbox"/> | <input type="checkbox"/> | 10.9                     | 1.04               |
| 29 | LOQ3        | Qua         | 4/8/2015 4:19:48 PM | 22            | 2015 4_07PQvalid3_V | 1.30e+004                  | 10.0                  | 3.51e+00              | <input checked="" type="checkbox"/> | <input type="checkbox"/> | 10.8                     | 1.05               |
| 30 | LOQ4        | Qua         | 4/8/2015 4:23:23 PM | 23            | 2015 4_07PQvalid3_V | 1.32e+004                  | 10.0                  | 3.87e+00              | <input checked="" type="checkbox"/> | <input type="checkbox"/> | 9.76                     | 1.04               |
| 31 | LOQ5        | Qua         | 4/8/2015 4:26:58 PM | 24            | 2015 4_07PQvalid3_V | 1.24e+004                  | 10.0                  | 3.77e+00              | <input checked="" type="checkbox"/> | <input type="checkbox"/> | 9.33                     | 1.04               |
| 32 | LOQ6        | Qua         | 4/8/2015 4:30:33 PM | 25            | 2015 4_07PQvalid3_V | 1.28e+004                  | 10.0                  | 3.65e+00              | <input checked="" type="checkbox"/> | <input type="checkbox"/> | 10.2                     | 1.05               |
| 33 | L1          | Qua         | 4/8/2015 4:34:08 PM | 26            | 2015 4_07PQvalid3_V | 3.52e+004                  | 30.0                  | 3.82e+00              | <input checked="" type="checkbox"/> | <input type="checkbox"/> | 30.6                     | 1.05               |

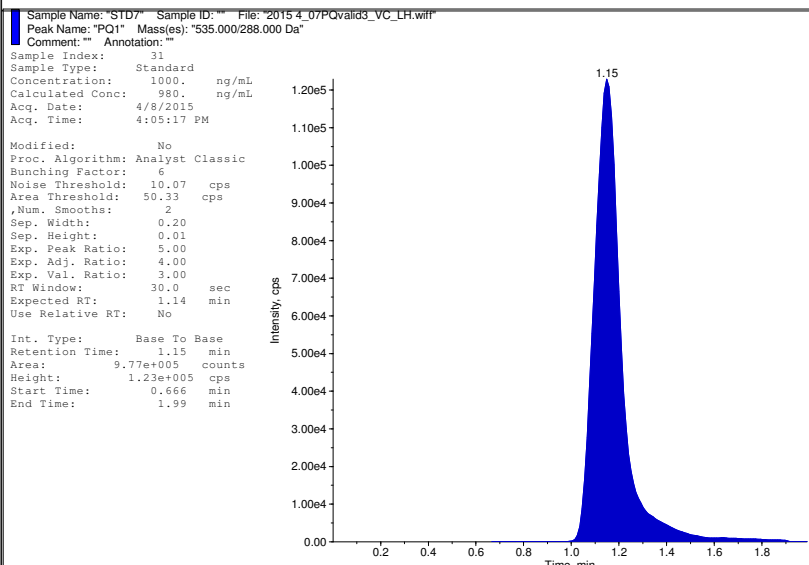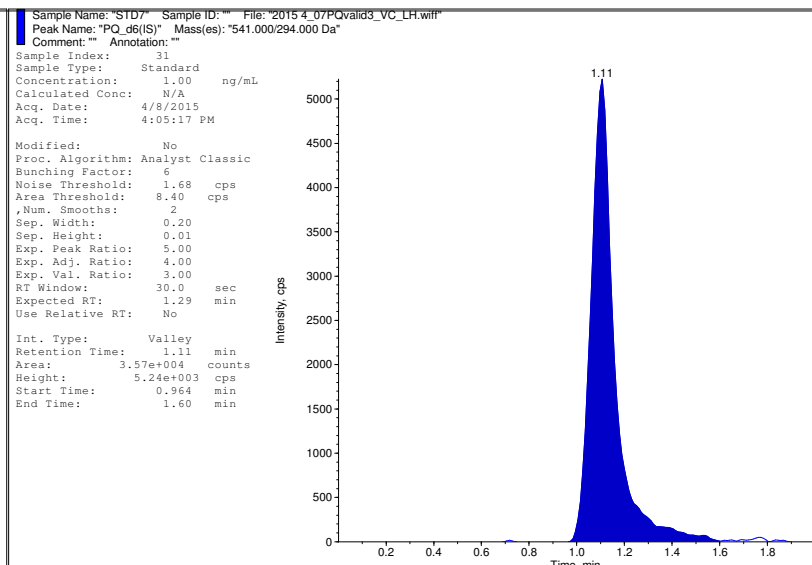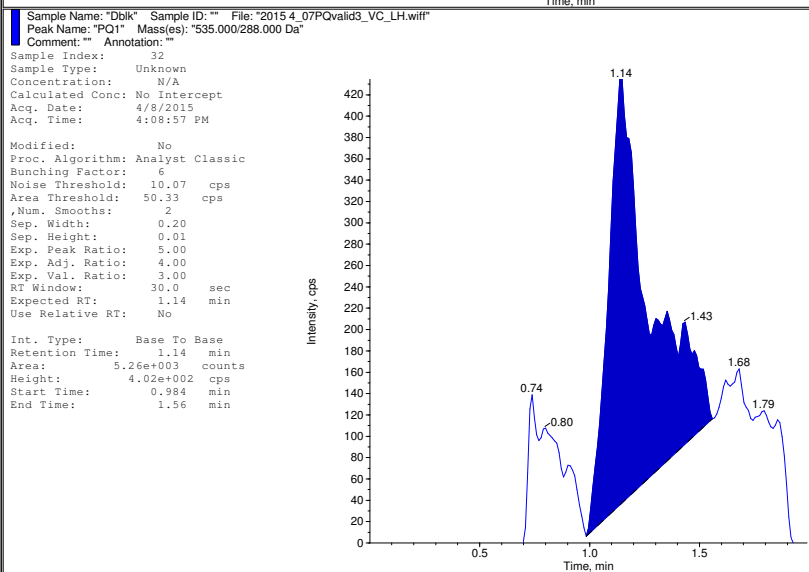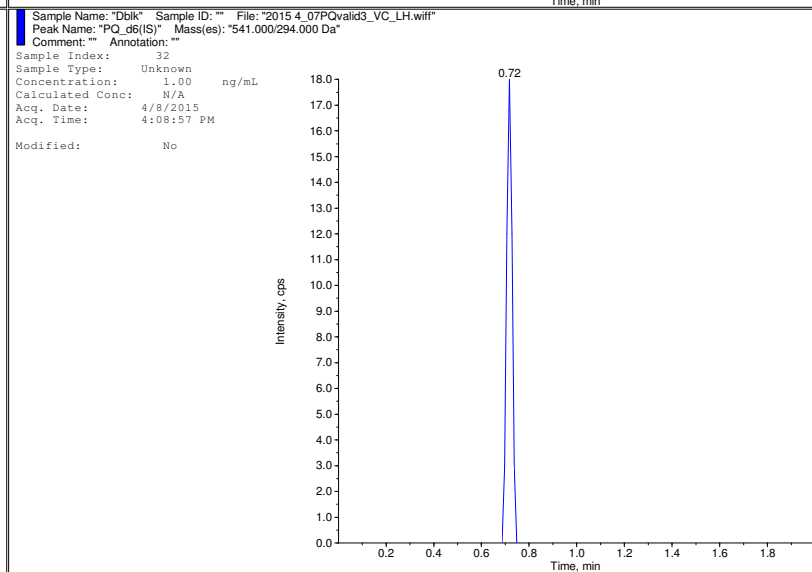

|    | Sample Name | Sample Type | Acquisition Date     | Via I Po | File Name              | Di lu ti | Analyte Peak Area (counts) | Analyte Conc | IS Peak Area (counts) | U s                                 | Re cor d                            | Calc ulate d Co |
|----|-------------|-------------|----------------------|----------|------------------------|----------|----------------------------|--------------|-----------------------|-------------------------------------|-------------------------------------|-----------------|
| 1  | Dbk         | Dou         | 4/14/2015 12:04:59 P | 1        | 2015_4_14crossvalid2_L | 1.       | 1.43e+002                  | 0.00         | 0.00e+00              |                                     | <input type="checkbox"/>            | N/A             |
| 2  | Blk         | Blan        | 4/14/2015 12:08:34 P | 2        | 2015_4_14crossvalid2_L | 1.       | 0.00e+000                  | 0.00         | 2.80e+00              |                                     | <input type="checkbox"/>            | N/A             |
| 3  | STD1        | Sta         | 4/14/2015 12:12:09 P | 3        | 2015_4_14crossvalid2_L | 1.       | 8.12e+003                  | 10.0         | 2.51e+00              | <input checked="" type="checkbox"/> | <input type="checkbox"/>            | 9.36            |
| 4  | STD2        | Sta         | 4/14/2015 12:15:44 P | 4        | 2015_4_14crossvalid2_L | 1.       | 1.87e+004                  | 25.0         | 2.35e+00              | <input checked="" type="checkbox"/> | <input type="checkbox"/>            | 25.5            |
| 5  | STD3        | Sta         | 4/14/2015 12:19:19 P | 5        | 2015_4_14crossvalid2_L | 1.       | 3.61e+004                  | 50.0         | 2.33e+00              | <input checked="" type="checkbox"/> | <input checked="" type="checkbox"/> | 51.2            |
| 6  | STD4        | Sta         | 4/14/2015 12:22:54 P | 6        | 2015_4_14crossvalid2_L | 1.       | 7.31e+004                  | 100.         | 2.45e+00              | <input checked="" type="checkbox"/> | <input type="checkbox"/>            | 100.            |
| 7  | STD5        | Sta         | 4/14/2015 12:26:34 P | 7        | 2015_4_14crossvalid2_L | 1.       | 1.71e+005                  | 250.         | 2.28e+00              | <input checked="" type="checkbox"/> | <input type="checkbox"/>            | 255.            |
| 8  | STD6        | Sta         | 4/14/2015 12:30:14 P | 8        | 2015_4_14crossvalid2_L | 1.       | 3.46e+005                  | 500.         | 2.35e+00              | <input checked="" type="checkbox"/> | <input type="checkbox"/>            | 503.            |
| 9  | STD7        | Sta         | 4/14/2015 12:33:54 P | 9        | 2015_4_14crossvalid2_L | 1.       | 6.66e+005                  | 1000.        | 2.29e+00              | <input checked="" type="checkbox"/> | <input type="checkbox"/>            | 991.            |
| 10 | Dbk         | Unk         | 4/14/2015 12:37:34 P | 1        | 2015_4_14crossvalid2_L | 1.       | 2.19e+002                  | N/A          | 0.00e+00              |                                     | <input checked="" type="checkbox"/> | #DIV/           |
| 11 | LOQ1        | Qua         | 4/14/2015 12:41:09 P | 10       | 2015_4_14crossvalid2_L | 1.       | 6.63e+003                  | 10.0         | 2.23e+00              | <input checked="" type="checkbox"/> | <input type="checkbox"/>            | 8.47            |
| 12 | L1          | Qua         | 4/14/2015 12:44:49 P | 11       | 2015_4_14crossvalid2_L | 1.       | 2.34e+004                  | 30.0         | 2.34e+00              | <input checked="" type="checkbox"/> | <input type="checkbox"/>            | 32.5            |
| 13 | M1          | Qua         | 4/14/2015 12:48:24 P | 12       | 2015_4_14crossvalid2_L | 1.       | 1.45e+005                  | 200.         | 2.32e+00              | <input checked="" type="checkbox"/> | <input type="checkbox"/>            | 212.            |
| 14 | H1          | Qua         | 4/14/2015 12:51:59 P | 13       | 2015_4_14crossvalid2_L | 1.       | 5.81e+005                  | 800.         | 2.40e+00              | <input checked="" type="checkbox"/> | <input type="checkbox"/>            | 827.            |
| 15 | H1_12.5ul   | Qua         | 4/14/2015 12:55:34 P | 14       | 2015_4_14crossvalid2_L | 2.       | 3.16e+005                  | 800.         | 2.50e+00              | <input checked="" type="checkbox"/> | <input type="checkbox"/>            | 859.            |
| 16 | sample9     | Unk         | 4/14/2015 12:59:09 P | 15       | 2015_4_14crossvalid2_L | 1.       | 6.75e+004                  | N/A          | 2.57e+00              |                                     | <input type="checkbox"/>            | 88.1            |

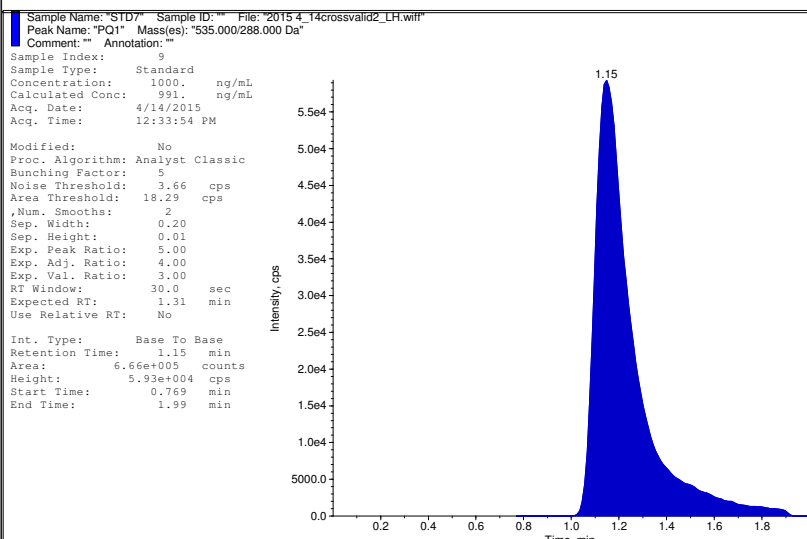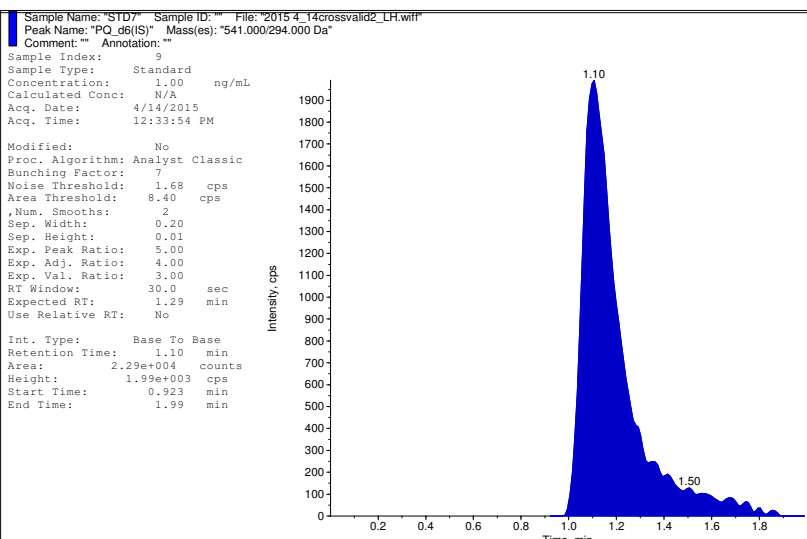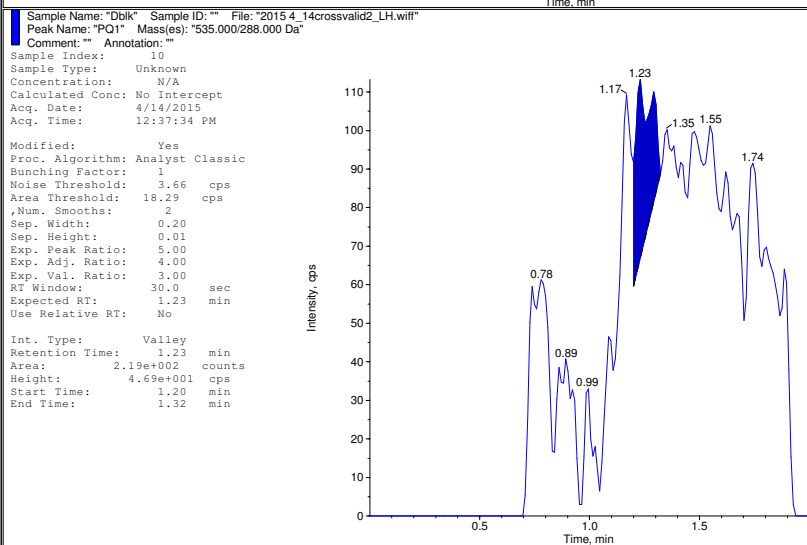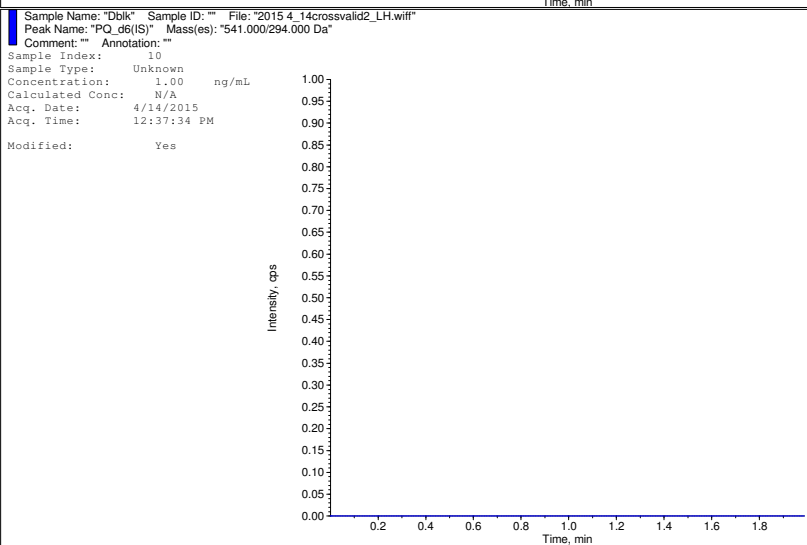

|    | Sample Name                      | Sample Type     | Acquisition Date    | File Name                                 |
|----|----------------------------------|-----------------|---------------------|-------------------------------------------|
| 6  | BLANK                            | Blank           | 6/5/2015 4:03:07 PM | 2015 06 05_BC1 PQ SAMPLES_56-65_84-91_315 |
| 7  | DOUBLE BLANK                     | Double Blank    | 6/5/2015 4:06:42 PM | 2015 06 05_BC1 PQ SAMPLES_56-65_84-91_315 |
| 8  | PQ STD 1                         | Standard        | 6/5/2015 4:10:17 PM | 2015 06 05_BC1 PQ SAMPLES_56-65_84-91_315 |
| 9  | PQ STD 2                         | Standard        | 6/5/2015 4:13:52 PM | 2015 06 05_BC1 PQ SAMPLES_56-65_84-91_315 |
| 10 | PQ STD 3                         | Standard        | 6/5/2015 4:17:28 PM | 2015 06 05_BC1 PQ SAMPLES_56-65_84-91_315 |
| 11 | PQ STD 4                         | Standard        | 6/5/2015 4:21:03 PM | 2015 06 05_BC1 PQ SAMPLES_56-65_84-91_315 |
| 12 | PQ STD 5                         | Standard        | 6/5/2015 4:24:42 PM | 2015 06 05_BC1 PQ SAMPLES_56-65_84-91_315 |
| 13 | PQ STD 6                         | Standard        | 6/5/2015 4:28:22 PM | 2015 06 05_BC1 PQ SAMPLES_56-65_84-91_315 |
| 14 | PQ STD 7                         | Standard        | 6/5/2015 4:32:03 PM | 2015 06 05_BC1 PQ SAMPLES_56-65_84-91_315 |
| 15 | DOUBLE BLANK                     | Double Blank    | 6/5/2015 4:35:43 PM | 2015 06 05_BC1 PQ SAMPLES_56-65_84-91_315 |
| 16 | PQ QC LOW 1                      | Quality Control | 6/5/2015 4:39:18 PM | 2015 06 05_BC1 PQ SAMPLES_56-65_84-91_315 |
| 17 | PQ QC MEDIUM 1                   | Quality Control | 6/5/2015 4:42:53 PM | 2015 06 05_BC1 PQ SAMPLES_56-65_84-91_315 |
| 18 | PQ QC HIGH 1                     | Quality Control | 6/5/2015 4:46:28 PM | 2015 06 05_BC1 PQ SAMPLES_56-65_84-91_315 |
| 19 | DOUBLE BLANK                     | Double Blank    | 6/5/2015 4:50:03 PM | 2015 06 05_BC1 PQ SAMPLES_56-65_84-91_315 |
| 20 | 56_283_IMWZT_Day 2, predose, pk  | Unknown         | 6/5/2015 4:53:38 PM | 2015 06 05_BC1 PQ SAMPLES_56-65_84-91_315 |
| 21 | 57_283_I36ZX_Day 2, 30min, pk DP | Unknown         | 6/5/2015 4:57:13 PM | 2015 06 05_BC1 PQ SAMPLES_56-65_84-91_315 |
| 22 | 58_283_IJ625_Day 2, 1hr, pk DP   | Unknown         | 6/5/2015 5:00:48 PM | 2015 06 05_BC1 PQ SAMPLES_56-65_84-91_315 |

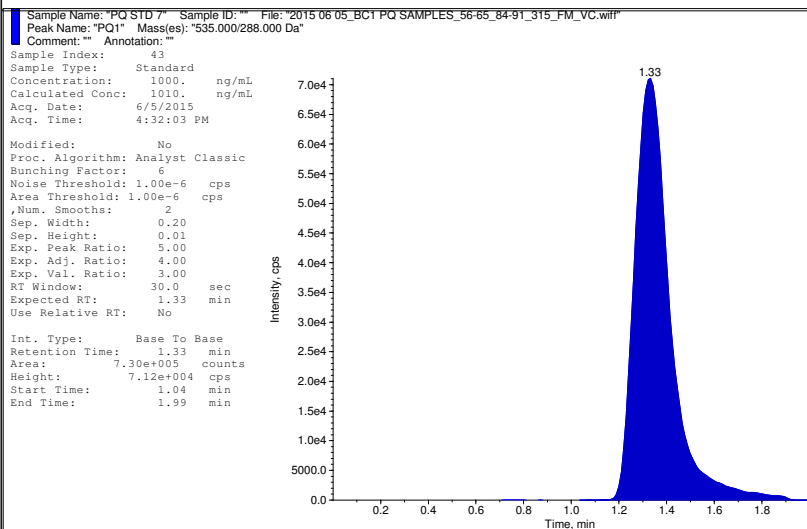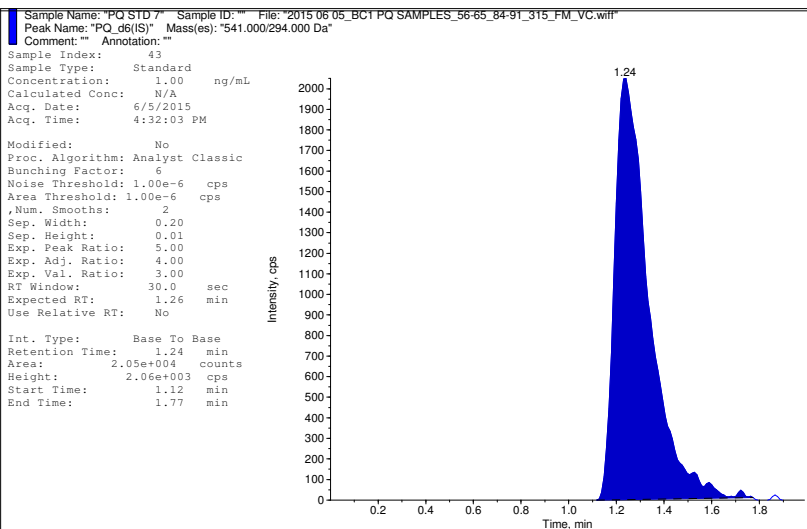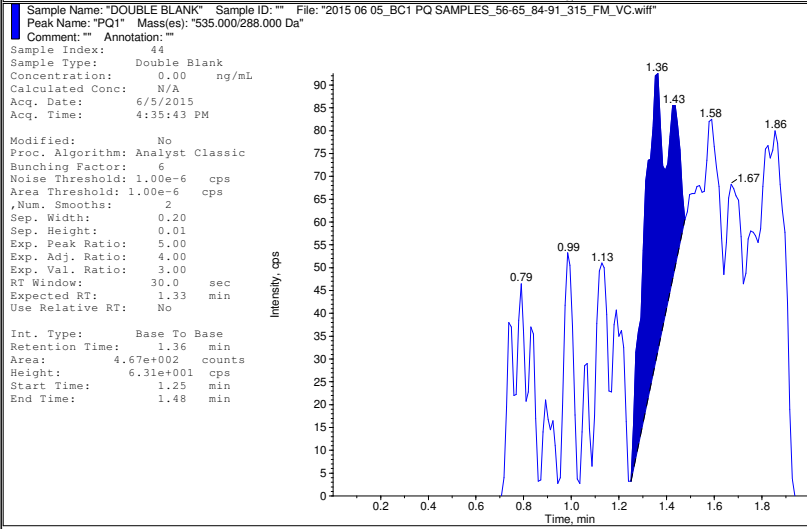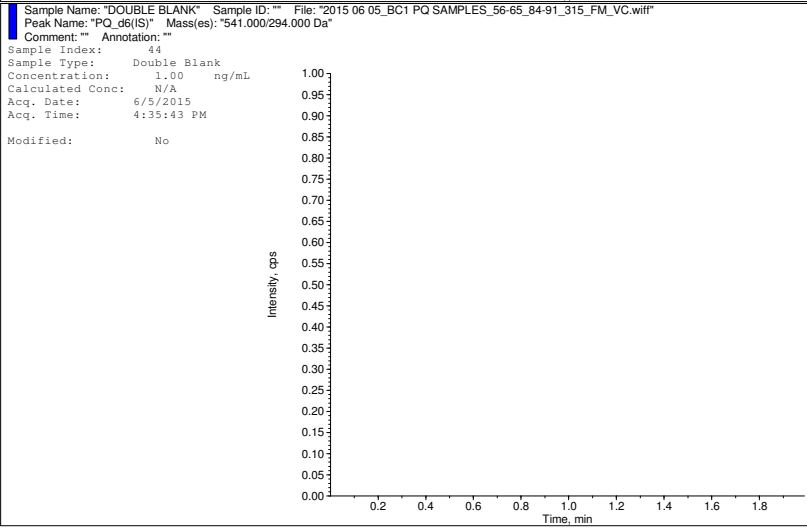

|    | Sample Name                           | Sample Type | Acquisition Date | File Name                           | Analyte Peak Area (cps) | Analyte Conc |
|----|---------------------------------------|-------------|------------------|-------------------------------------|-------------------------|--------------|
| 10 | DOUBLE BLANK                          | Dou         | 7/30/2015        | 2015 07 30_BC2 PK Samples_29-42_VC. | 0.00                    | 0.00         |
| 11 | DOUBLE BLANK                          | Dou         | 7/30/2015        | 2015 07 30_BC2 PK Samples_29-42_VC. | 0.00                    | 0.00         |
| 12 | BLANK                                 | Blan        | 7/30/2015        | 2015 07 30_BC2 PK Samples_29-42_VC. | 0.00                    | 0.00         |
| 13 | BLANK                                 | Blan        | 7/30/2015        | 2015 07 30_BC2 PK Samples_29-42_VC. | 0.00                    | 0.00         |
| 14 | BLANK                                 | Blan        | 7/30/2015        | 2015 07 30_BC2 PK Samples_29-42_VC. | 0.00                    | 0.00         |
| 15 | DOUBLE BLANK                          | Dou         | 7/30/2015        | 2015 07 30_BC2 PK Samples_29-42_VC. | 0.00                    | 0.00         |
| 16 | PQ STD 1                              | Sta         | 7/30/2015        | 2015 07 30_BC2 PK Samples_29-42_VC. | 4870.                   | 10.0         |
| 17 | PQ STD 2                              | Sta         | 7/30/2015        | 2015 07 30_BC2 PK Samples_29-42_VC. | 12000.                  | 25.0         |
| 18 | PQ STD 3                              | Sta         | 7/30/2015        | 2015 07 30_BC2 PK Samples_29-42_VC. | 25200.                  | 50.0         |
| 19 | PQ STD 4                              | Sta         | 7/30/2015        | 2015 07 30_BC2 PK Samples_29-42_VC. | 53300.                  | 100.         |
| 20 | PQ STD 5                              | Sta         | 7/30/2015        | 2015 07 30_BC2 PK Samples_29-42_VC. | 127000.                 | 250.         |
| 21 | PQ STD 6                              | Sta         | 7/30/2015        | 2015 07 30_BC2 PK Samples_29-42_VC. | 259000.                 | 500.         |
| 22 | PQ STD 7                              | Sta         | 7/30/2015        | 2015 07 30_BC2 PK Samples_29-42_VC. | 503000.                 | 1000.        |
| 23 | DOUBLE BLANK                          | Dou         | 7/30/2015        | 2015 07 30_BC2 PK Samples_29-42_VC. | 0.00                    | 0.00         |
| 24 | PQ QC LOW 1                           | Qua         | 7/30/2015        | 2015 07 30_BC2 PK Samples_29-42_VC. | 16500.                  | 30.0         |
| 25 | PQ QC MEDIUM 1                        | Qua         | 7/30/2015        | 2015 07 30_BC2 PK Samples_29-42_VC. | 99800.                  | 200.         |
| 26 | PQ QC HIGH 1                          | Qua         | 7/30/2015        | 2015 07 30_BC2 PK Samples_29-42_VC. | 413000.                 | 800.         |
| 27 | DOUBLE BLANK                          | Dou         | 7/30/2015        | 2015 07 30_BC2 PK Samples_29-42_VC. | 490.                    | 0.00         |
| 28 | 29_B2-0013-AR_Day 2, predose, pk DP_I | Unk         | 7/30/2015        | 2015 07 30_BC2 PK Samples_29-42_VC. | 24000.                  | N/A          |
| 29 | 30_B2-0013-AR_Day 2, 30min, pk DP_I2S | Unk         | 7/30/2015        | 2015 07 30_BC2 PK Samples_29-42_VC. | 25300.                  | N/A          |
| 30 | 31_B2-0013-AR_Day 2, 1hr, pk DP_ISNP  | Unk         | 7/30/2015        | 2015 07 30_BC2 PK Samples_29-42_VC. | 23900.                  | N/A          |

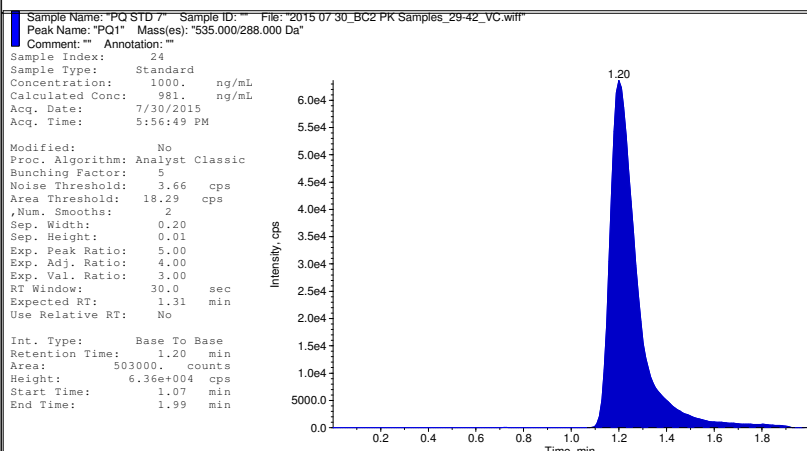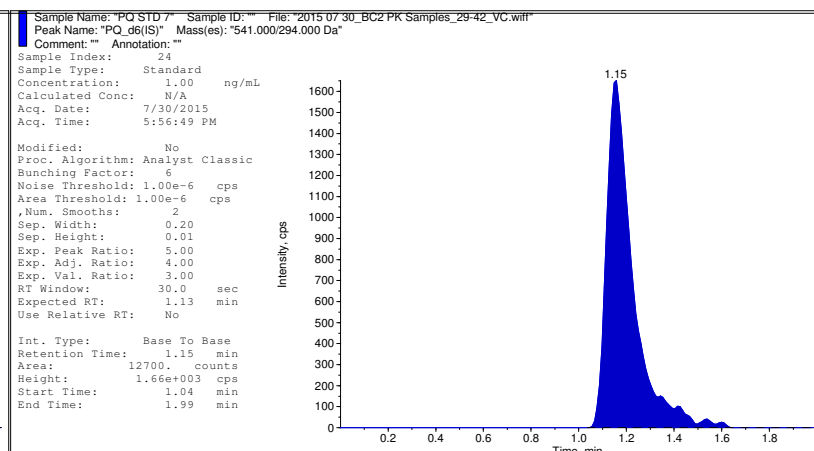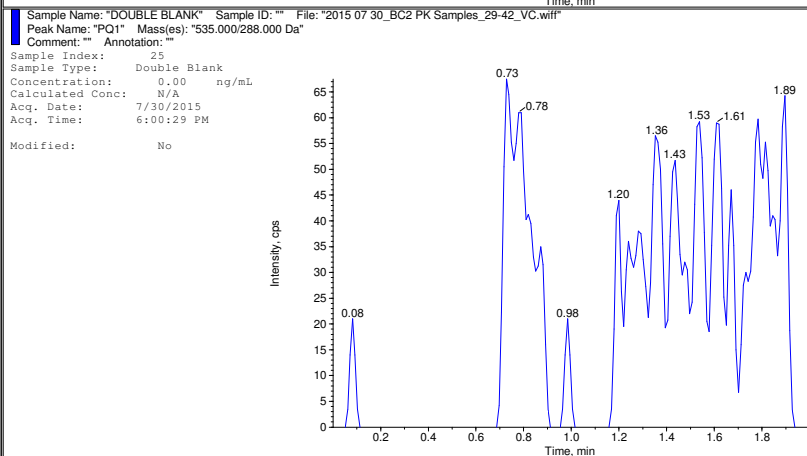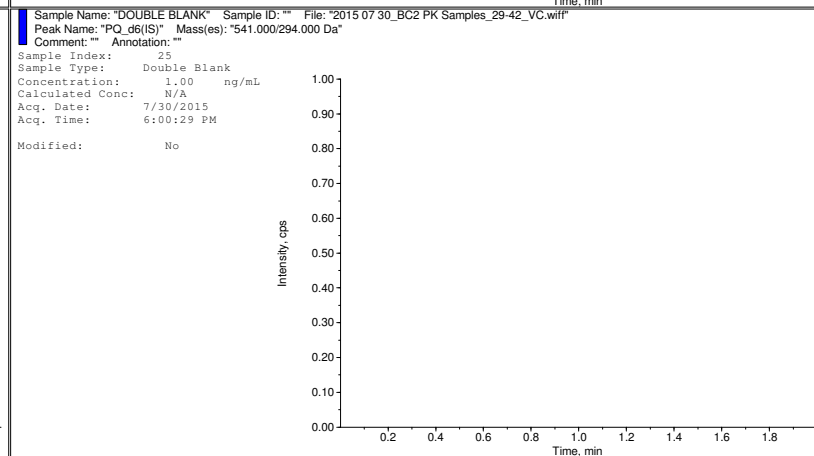

|    | Sample Name    | Sample T | Acquisit | File Name                           | Analyte Peak Area (co | Analyt e Conce | IS Peak Area ( | U se R                              | Rec ord Mo               |
|----|----------------|----------|----------|-------------------------------------|-----------------------|----------------|----------------|-------------------------------------|--------------------------|
| 15 | BLANK          | Blan     | 8/3/2015 | 2015 08 03_BC2 PK Samples_85-239_FM | 0.00                  | 0.00           | 16100.         |                                     | <input type="checkbox"/> |
| 16 | BLANK          | Blan     | 8/3/2015 | 2015 08 03_BC2 PK Samples_85-239_FM | 0.00                  | 0.00           | 16300.         |                                     | <input type="checkbox"/> |
| 17 | DOUBLE BLANK   | Dou      | 8/3/2015 | 2015 08 03_BC2 PK Samples_85-239_FM | 0.00                  | 0.00           | 0.00           |                                     | <input type="checkbox"/> |
| 18 | PQ STD 1       | Sta      | 8/3/2015 | 2015 08 03_BC2 PK Samples_85-239_FM | 6190.                 | 10.0           | 23900.         | <input checked="" type="checkbox"/> | <input type="checkbox"/> |
| 19 | PQ STD 2       | Sta      | 8/3/2015 | 2015 08 03_BC2 PK Samples_85-239_FM | 16100.                | 25.0           | 23300.         | <input checked="" type="checkbox"/> | <input type="checkbox"/> |
| 20 | PQ STD 3       | Sta      | 8/3/2015 | 2015 08 03_BC2 PK Samples_85-239_FM | 32700.                | 50.0           | 23500.         | <input checked="" type="checkbox"/> | <input type="checkbox"/> |
| 21 | PQ STD 4       | Sta      | 8/3/2015 | 2015 08 03_BC2 PK Samples_85-239_FM | 67200.                | 100.           | 24600.         | <input checked="" type="checkbox"/> | <input type="checkbox"/> |
| 22 | PQ STD 5       | Sta      | 8/3/2015 | 2015 08 03_BC2 PK Samples_85-239_FM | 156000.               | 250.           | 22800.         | <input checked="" type="checkbox"/> | <input type="checkbox"/> |
| 23 | PQ STD 6       | Sta      | 8/3/2015 | 2015 08 03_BC2 PK Samples_85-239_FM | 320000.               | 500.           | 22900.         | <input checked="" type="checkbox"/> | <input type="checkbox"/> |
| 24 | PQ STD 7       | Sta      | 8/3/2015 | 2015 08 03_BC2 PK Samples_85-239_FM | 634000.               | 1000.          | 23300.         | <input checked="" type="checkbox"/> | <input type="checkbox"/> |
| 25 | DOUBLE BLANK   | Dou      | 8/3/2015 | 2015 08 03_BC2 PK Samples_85-239_FM | 431.                  | 0.00           | 0.00           |                                     | <input type="checkbox"/> |
| 26 | PQ QC LOW 1    | Qua      | 8/3/2015 | 2015 08 03_BC2 PK Samples_85-239_FM | 21300.                | 30.0           | 24600.         | <input checked="" type="checkbox"/> | <input type="checkbox"/> |
| 27 | PQ QC MEDIUM 1 | Qua      | 8/3/2015 | 2015 08 03_BC2 PK Samples_85-239_FM | 132000.               | 200.           | 22600.         | <input checked="" type="checkbox"/> | <input type="checkbox"/> |
| 28 | PQ QC HIGH 1   | Qua      | 8/3/2015 | 2015 08 03_BC2 PK Samples_85-239_FM | 517000.               | 800.           | 22400.         | <input checked="" type="checkbox"/> | <input type="checkbox"/> |

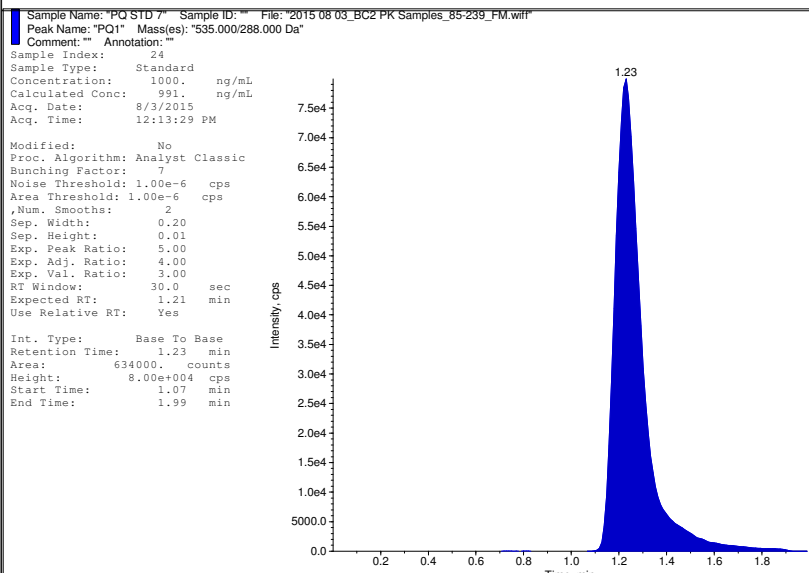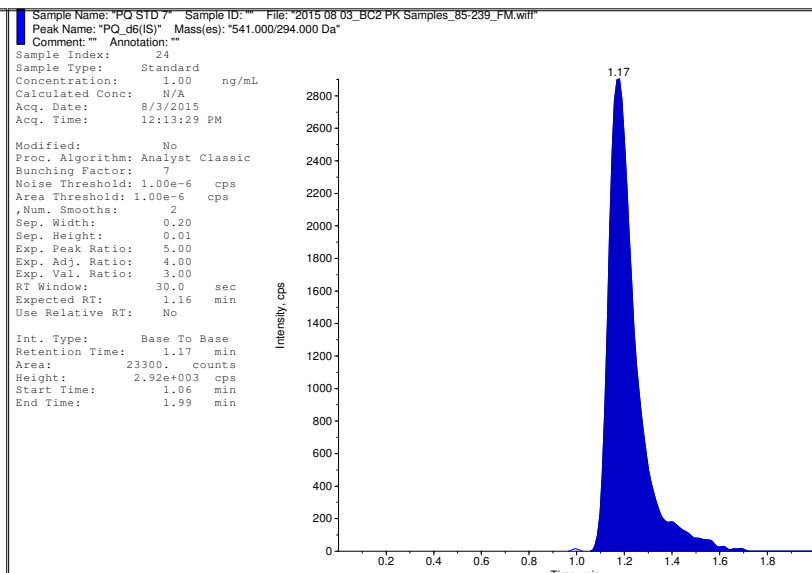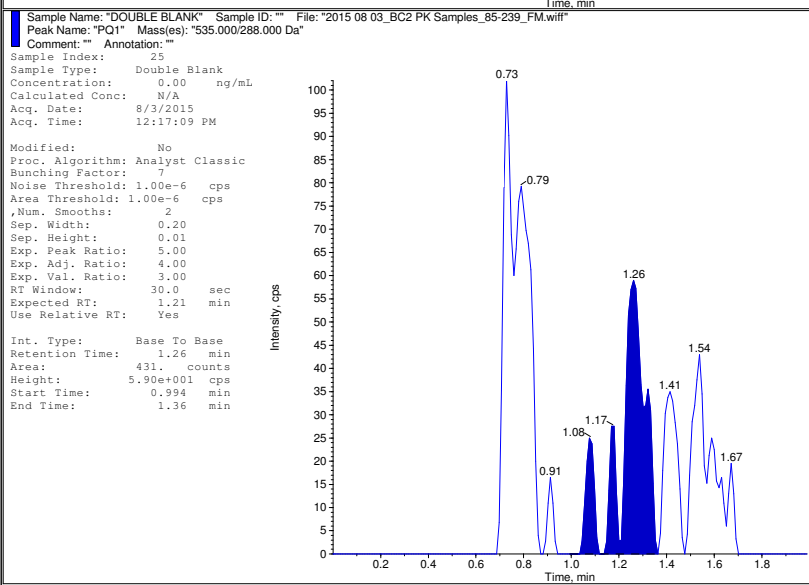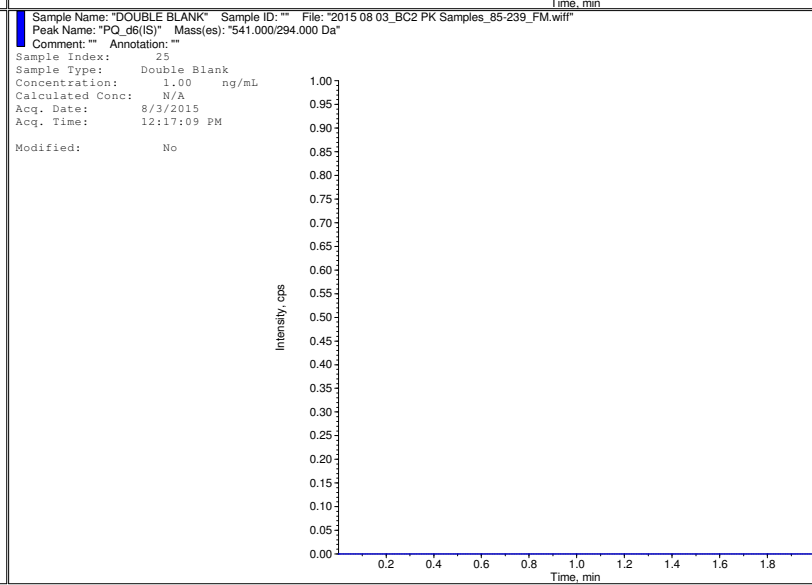

|    | Sample Name      | Sample Type | Acquisition Date    | File Name                        | Analyte Peak Area (counts) | Analyte Conc | IS Peak Area (counts) | Use                                 | Rec                      |
|----|------------------|-------------|---------------------|----------------------------------|----------------------------|--------------|-----------------------|-------------------------------------|--------------------------|
| 13 | PQ STD 4         | Sta         | 1/26/2016 4:37:32 P | 2016 01 26_BC1 Children_3-39_VC. | 7.47e+004                  | 100.         | 9.11e+003             | <input checked="" type="checkbox"/> | <input type="checkbox"/> |
| 14 | PQ STD 5         | Sta         | 1/26/2016 4:41:12 P | 2016 01 26_BC1 Children_3-39_VC. | 1.83e+005                  | 250.         | 8.58e+003             | <input checked="" type="checkbox"/> | <input type="checkbox"/> |
| 15 | PQ STD 6         | Sta         | 1/26/2016 4:44:52 P | 2016 01 26_BC1 Children_3-39_VC. | 3.62e+005                  | 500.         | 8.77e+003             | <input checked="" type="checkbox"/> | <input type="checkbox"/> |
| 16 | PQ STD 7         | Sta         | 1/26/2016 4:48:32 P | 2016 01 26_BC1 Children_3-39_VC. | 6.77e+005                  | 1000.        | 8.35e+003             | <input checked="" type="checkbox"/> | <input type="checkbox"/> |
| 17 | DOUBLE BLANK     | Dou         | 1/26/2016 4:52:12 P | 2016 01 26_BC1 Children_3-39_VC. | 7.80e+002                  | 0.00         | 0.00e+000             | <input type="checkbox"/>            | <input type="checkbox"/> |
| 18 | PQ QC LOW 1      | Qua         | 1/26/2016 4:55:47 P | 2016 01 26_BC1 Children_3-39_VC. | 2.28e+004                  | 30.0         | 8.97e+003             | <input checked="" type="checkbox"/> | <input type="checkbox"/> |
| 19 | PQ QC MEDIUM 1   | Qua         | 1/26/2016 4:59:22 P | 2016 01 26_BC1 Children_3-39_VC. | 1.43e+005                  | 200.         | 8.63e+003             | <input checked="" type="checkbox"/> | <input type="checkbox"/> |
| 20 | PQ QC HIGH 1     | Qua         | 1/26/2016 5:02:57 P | 2016 01 26_BC1 Children_3-39_VC. | 5.57e+005                  | 800.         | 8.18e+003             | <input checked="" type="checkbox"/> | <input type="checkbox"/> |
| 21 | DOUBLE BLANK     | Dou         | 1/26/2016 5:06:32 P | 2016 01 26_BC1 Children_3-39_VC. | 4.26e+002                  | 0.00         | 0.00e+000             | <input type="checkbox"/>            | <input type="checkbox"/> |
| 22 | BC1 Children - 3 | Unk         | 1/26/2016 5:10:07 P | 2016 01 26_BC1 Children_3-39_VC. | 1.57e+004                  | N/A          | 7.37e+003             | <input type="checkbox"/>            | <input type="checkbox"/> |
| 23 | BC1 Children - 4 | Unk         | 1/26/2016 5:13:42 P | 2016 01 26_BC1 Children_3-39_VC. | 1.85e+004                  | N/A          | 7.13e+003             | <input type="checkbox"/>            | <input type="checkbox"/> |
| 24 | BC1 Children - 5 | Unk         | 1/26/2016 5:17:21 P | 2016 01 26_BC1 Children_3-39_VC. | 5.72e+004                  | N/A          | 7.02e+003             | <input type="checkbox"/>            | <input type="checkbox"/> |
| 25 | BC1 Children - 6 | Unk         | 1/26/2016 5:20:57 P | 2016 01 26_BC1 Children_3-39_VC. | 7.85e+004                  | N/A          | 6.87e+003             | <input type="checkbox"/>            | <input type="checkbox"/> |

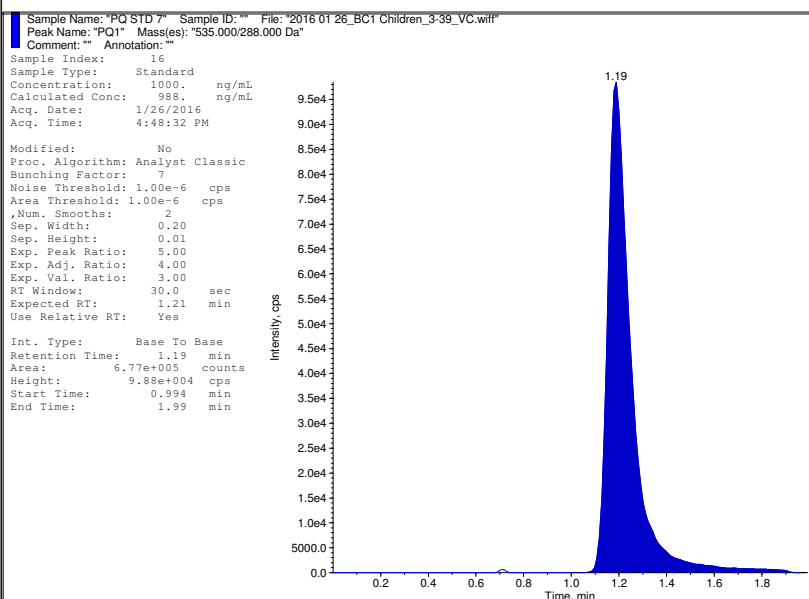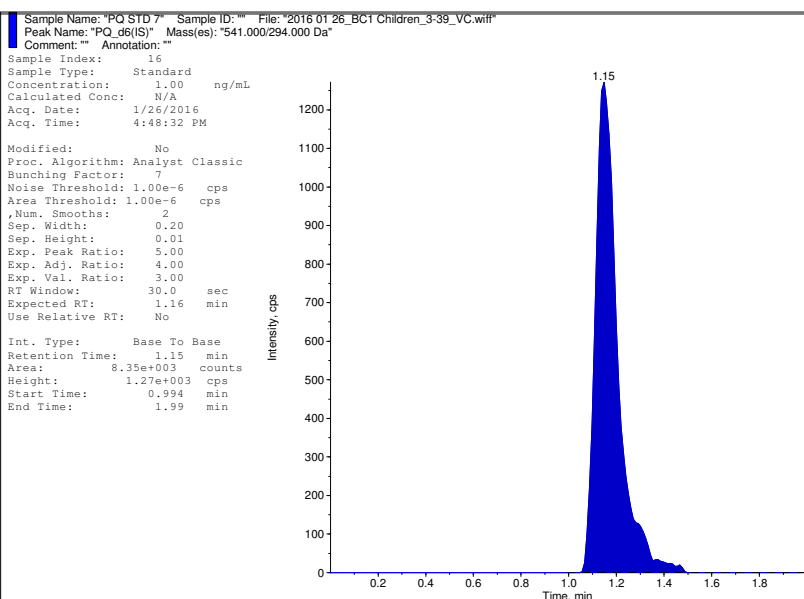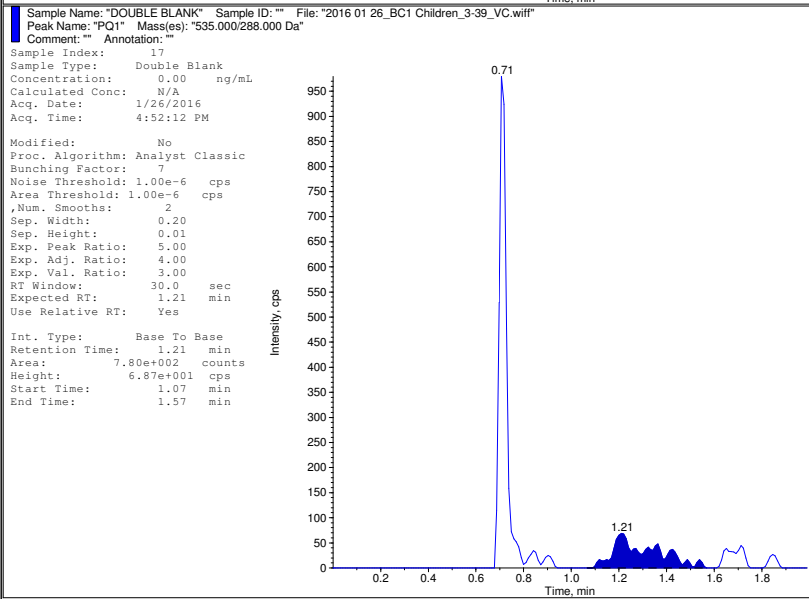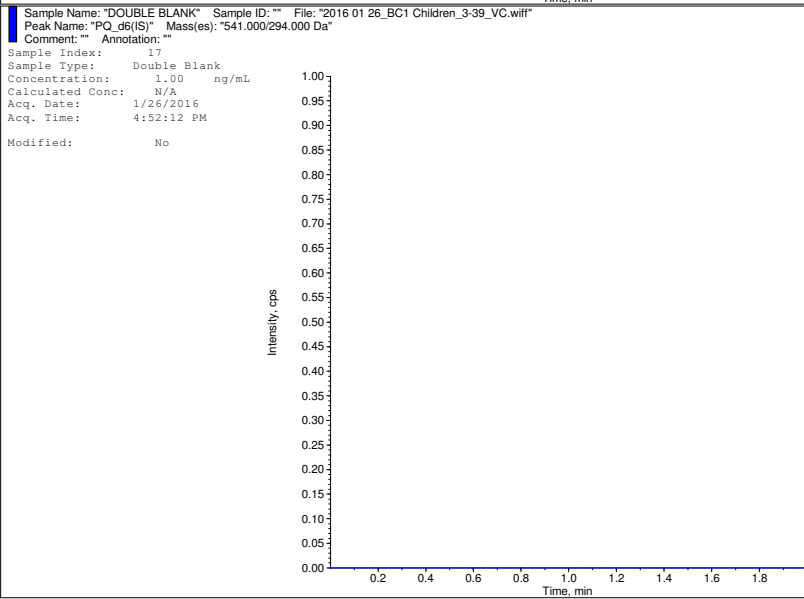

|    | Sample Name          | Sample Type | Acquisition Date     | File Name                         | Analyte Peak Area (counts) | Analyte Conc | IS Peak Area (counts) | Use                                 | Rec                      |
|----|----------------------|-------------|----------------------|-----------------------------------|----------------------------|--------------|-----------------------|-------------------------------------|--------------------------|
| 1  | SYSTEM SUITABILITY 1 | Unk         | 1/28/2016 11:52:28 A | 2016 01 27_BC1 Children_47-130_VC | 3.30e+005                  | N/A          | 7.46e+003             |                                     |                          |
| 2  | SYSTEM SUITABILITY 2 | Unk         | 1/28/2016 11:56:03 A | 2016 01 27_BC1 Children_47-130_VC | 2.97e+005                  | N/A          | 6.12e+003             |                                     |                          |
| 3  | SYSTEM SUITABILITY 3 | Unk         | 1/28/2016 11:59:38 A | 2016 01 27_BC1 Children_47-130_VC | 2.73e+005                  | N/A          | 6.20e+003             |                                     |                          |
| 4  | SYSTEM SUITABILITY 4 | Unk         | 1/28/2016 12:03:13 P | 2016 01 27_BC1 Children_47-130_VC | 3.26e+005                  | N/A          | 6.69e+003             |                                     |                          |
| 5  | SYSTEM SUITABILITY 5 | Unk         | 1/28/2016 12:06:48 P | 2016 01 27_BC1 Children_47-130_VC | 3.31e+005                  | N/A          | 7.06e+003             |                                     |                          |
| 6  | SYSTEM SUITABILITY 6 | Dou         | 1/28/2016 12:10:23 P | 2016 01 27_BC1 Children_47-130_VC | 3.12e+005                  | 0.00         | 6.87e+003             |                                     |                          |
| 7  | DOUBLE BLANK         | Dou         | 1/28/2016 12:13:59 P | 2016 01 27_BC1 Children_47-130_VC | 6.93e+002                  | 0.00         | 0.00e+000             |                                     |                          |
| 8  | BLANK                | Blan        | 1/28/2016 12:17:36 P | 2016 01 27_BC1 Children_47-130_VC | 0.00e+000                  | 0.00         | 5.93e+003             |                                     |                          |
| 9  | DOUBLE BLANK         | Dou         | 1/28/2016 12:21:13 P | 2016 01 27_BC1 Children_47-130_VC | 0.00e+000                  | 0.00         | 0.00e+000             |                                     |                          |
| 10 | PQ STD 1             | Sta         | 1/28/2016 12:24:49 P | 2016 01 27_BC1 Children_47-130_VC | 5.07e+003                  | 10.0         | 5.85e+003             | <input checked="" type="checkbox"/> | <input type="checkbox"/> |
| 11 | PQ STD 2             | Sta         | 1/28/2016 12:28:26 P | 2016 01 27_BC1 Children_47-130_VC | 1.43e+004                  | 25.0         | 6.06e+003             | <input checked="" type="checkbox"/> | <input type="checkbox"/> |
| 12 | PQ STD 3             | Sta         | 1/28/2016 12:32:04 P | 2016 01 27_BC1 Children_47-130_VC | 2.66e+004                  | 50.0         | 6.04e+003             | <input checked="" type="checkbox"/> | <input type="checkbox"/> |
| 13 | PQ STD 4             | Sta         | 1/28/2016 12:35:44 P | 2016 01 27_BC1 Children_47-130_VC | 5.28e+004                  | 100.         | 6.12e+003             | <input checked="" type="checkbox"/> | <input type="checkbox"/> |
| 14 | PQ STD 5             | Sta         | 1/28/2016 12:39:24 P | 2016 01 27_BC1 Children_47-130_VC | 1.31e+005                  | 250.         | 5.79e+003             | <input checked="" type="checkbox"/> | <input type="checkbox"/> |
| 15 | PQ STD 6             | Sta         | 1/28/2016 12:43:04 P | 2016 01 27_BC1 Children_47-130_VC | 2.60e+005                  | 500.         | 5.85e+003             | <input checked="" type="checkbox"/> | <input type="checkbox"/> |
| 16 | PQ STD 7             | Sta         | 1/28/2016 12:46:44 P | 2016 01 27_BC1 Children_47-130_VC | 4.58e+005                  | 1000.        | 5.49e+003             | <input checked="" type="checkbox"/> | <input type="checkbox"/> |
| 17 | DOUBLE BLANK         | Dou         | 1/28/2016 12:50:24 P | 2016 01 27_BC1 Children_47-130_VC | 0.00e+000                  | 0.00         | 0.00e+000             |                                     |                          |
| 18 | PQ QC LOW 1          | Qua         | 1/28/2016 12:53:59 P | 2016 01 27_BC1 Children_47-130_VC | 1.72e+004                  | 30.0         | 6.09e+003             | <input checked="" type="checkbox"/> | <input type="checkbox"/> |
| 19 | PQ QC MEDIUM 1       | Qua         | 1/28/2016 12:57:34 P | 2016 01 27_BC1 Children_47-130_VC | 1.15e+005                  | 200.         | 6.18e+003             | <input checked="" type="checkbox"/> | <input type="checkbox"/> |
| 20 | PQ QC HIGH 1         | Qua         | 1/28/2016 1:01:09 P  | 2016 01 27_BC1 Children_47-130_VC | 4.11e+005                  | 800.         | 5.50e+003             | <input checked="" type="checkbox"/> | <input type="checkbox"/> |
| 21 | DOUBLE BLANK         | Dou         | 1/28/2016 1:04:44 P  | 2016 01 27_BC1 Children_47-130_VC | 8.86e+002                  | 0.00         | 0.00e+000             |                                     |                          |

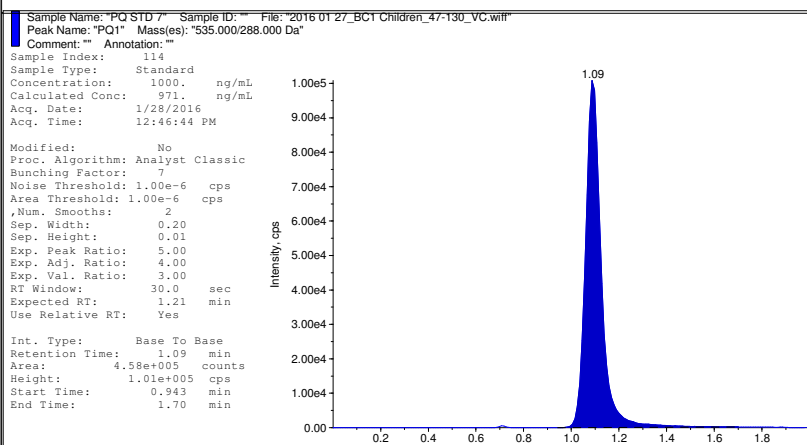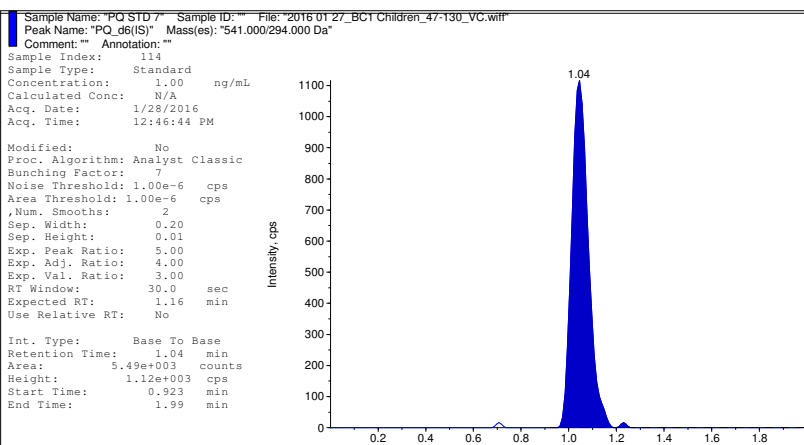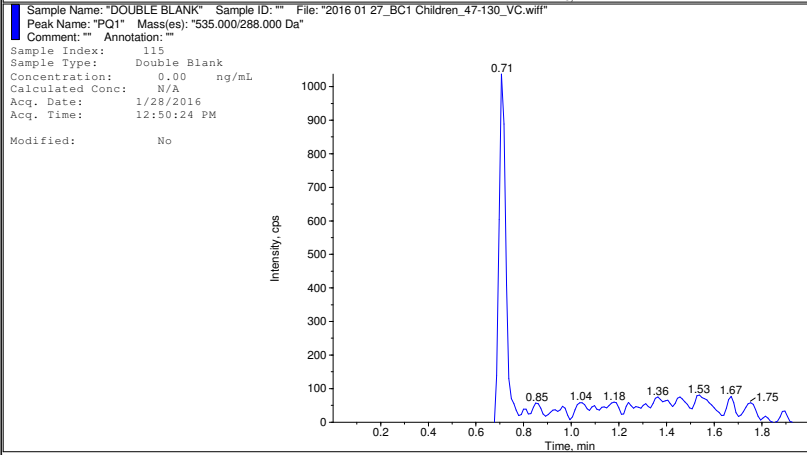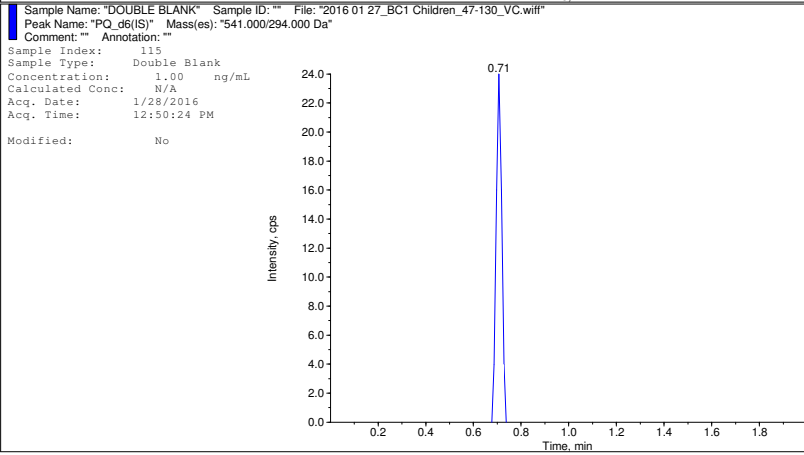

|    | Sample Name          | Sample Type | Acquisition Date    | File Name                                   | Analyte Peak Area (counts) | Analyte Conc |
|----|----------------------|-------------|---------------------|---------------------------------------------|----------------------------|--------------|
| 1  | SYSTEM SUITABILITY 1 | Unk         | 2/4/2016 12:22:26 P | 2016 02 04_BC1 Children_Nov Shipment_1-81_V | 2.00e+005                  | N/A          |
| 2  | SYSTEM SUITABILITY 2 | Unk         | 2/4/2016 12:25:59 P | 2016 02 04_BC1 Children_Nov Shipment_1-81_V | 1.95e+005                  | N/A          |
| 3  | SYSTEM SUITABILITY 3 | Unk         | 2/4/2016 12:29:34 P | 2016 02 04_BC1 Children_Nov Shipment_1-81_V | 2.40e+005                  | N/A          |
| 4  | SYSTEM SUITABILITY 4 | Unk         | 2/4/2016 12:33:09 P | 2016 02 04_BC1 Children_Nov Shipment_1-81_V | 2.35e+005                  | N/A          |
| 5  | SYSTEM SUITABILITY 5 | Unk         | 2/4/2016 12:36:44 P | 2016 02 04_BC1 Children_Nov Shipment_1-81_V | 2.11e+005                  | N/A          |
| 6  | SYSTEM SUITABILITY 6 | Unk         | 2/4/2016 12:40:19 P | 2016 02 04_BC1 Children_Nov Shipment_1-81_V | 2.13e+005                  | N/A          |
| 7  | DOUBLE BLANK         | Dou         | 2/4/2016 12:43:54 P | 2016 02 04_BC1 Children_Nov Shipment_1-81_V | 4.77e+002                  | 0.00         |
| 8  | BLANK                | Blan        | 2/4/2016 12:47:30 P | 2016 02 04_BC1 Children_Nov Shipment_1-81_V | 0.00e+000                  | 0.00         |
| 9  | DOUBLE BLANK         | Dou         | 2/4/2016 12:51:04 P | 2016 02 04_BC1 Children_Nov Shipment_1-81_V | 0.00e+000                  | 0.00         |
| 10 | PQ STD 1             | Sta         | 2/4/2016 12:54:39 P | 2016 02 04_BC1 Children_Nov Shipment_1-81_V | 3.35e+003                  | 10.0         |
| 11 | PQ STD 2             | Sta         | 2/4/2016 12:58:15 P | 2016 02 04_BC1 Children_Nov Shipment_1-81_V | 9.98e+003                  | 25.0         |
| 12 | PQ STD 3             | Sta         | 2/4/2016 1:01:50 PM | 2016 02 04_BC1 Children_Nov Shipment_1-81_V | 2.15e+004                  | 50.0         |
| 13 | PQ STD 4             | Sta         | 2/4/2016 1:05:25 PM | 2016 02 04_BC1 Children_Nov Shipment_1-81_V | 4.98e+004                  | 100.         |
| 14 | PQ STD 5             | Sta         | 2/4/2016 1:09:05 PM | 2016 02 04_BC1 Children_Nov Shipment_1-81_V | 1.27e+005                  | 250.         |
| 15 | PQ STD 6             | Sta         | 2/4/2016 1:12:45 PM | 2016 02 04_BC1 Children_Nov Shipment_1-81_V | 2.71e+005                  | 500.         |
| 16 | PQ STD 7             | Sta         | 2/4/2016 1:16:25 PM | 2016 02 04_BC1 Children_Nov Shipment_1-81_V | 5.20e+005                  | 1000.        |
| 17 | DOUBLE BLANK         | Dou         | 2/4/2016 1:20:05 PM | 2016 02 04_BC1 Children_Nov Shipment_1-81_V | 3.69e+002                  | 0.00         |
| 18 | PQ QC LOW 1          | Qua         | 2/4/2016 1:23:40 PM | 2016 02 04_BC1 Children_Nov Shipment_1-81_V | 1.49e+004                  | 30.0         |
| 19 | PQ QC MEDIUM 1       | Qua         | 2/4/2016 1:27:15 PM | 2016 02 04_BC1 Children_Nov Shipment_1-81_V | 1.02e+005                  | 200.         |
| 20 | PQ QC HIGH 1         | Qua         | 2/4/2016 1:30:50 PM | 2016 02 04_BC1 Children_Nov Shipment_1-81_V | 4.15e+005                  | 800.         |

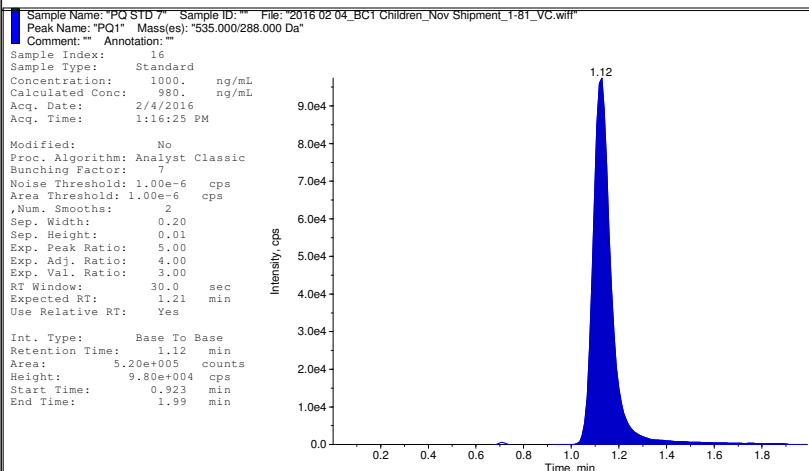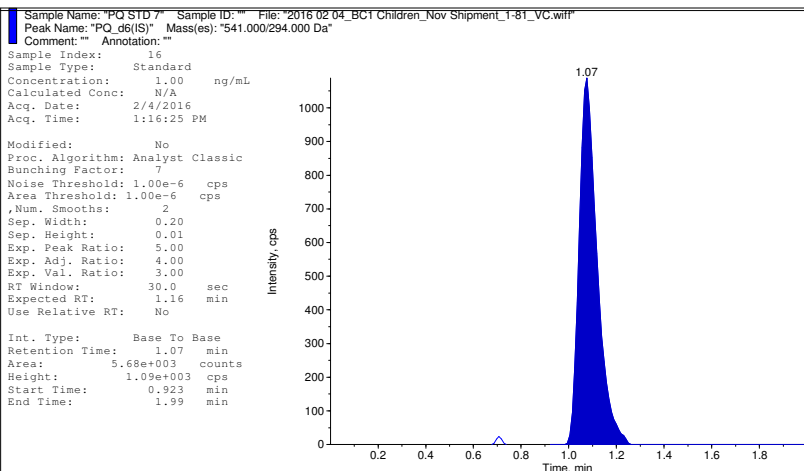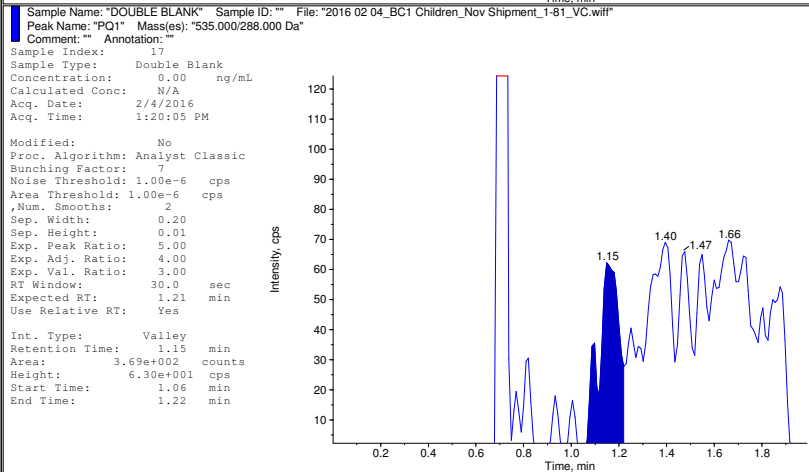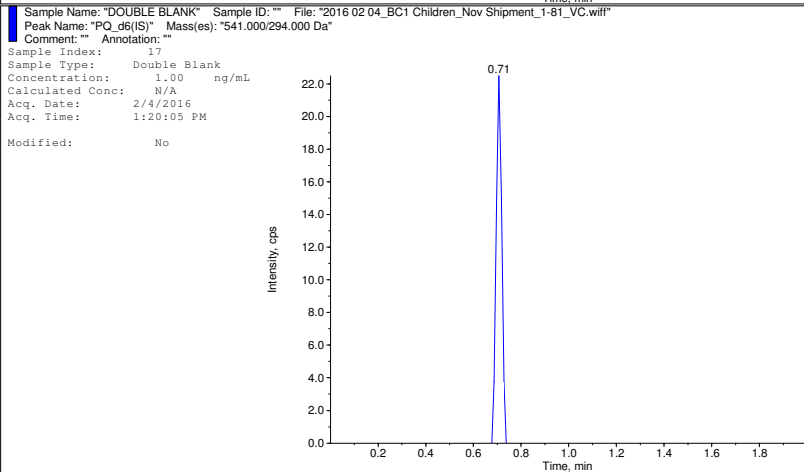



|    | Sample Name    | Sample Type | Acquisition Date | File Name                                     | Analyte Peak Area (counts) | Analyte Concentration | IS Peak Area (counts) |
|----|----------------|-------------|------------------|-----------------------------------------------|----------------------------|-----------------------|-----------------------|
| 11 | DOUBLE BLANK   | Dou         | 3/1/2016 1       | 2016 03 01_BC1 PQ Control SAMPLES_211-278_FM. | 0.00                       | 0.00                  | 0.00                  |
| 12 | DOUBLE BLANK   | Dou         | 3/1/2016 1       | 2016 03 01_BC1 PQ Control SAMPLES_211-278_FM. | 0.00                       | 0.00                  | 0.00                  |
| 13 | BLANK          | Blan        | 3/1/2016 1       | 2016 03 01_BC1 PQ Control SAMPLES_211-278_FM. | 0.00                       | 0.00                  | 19200.                |
| 14 | BLANK          | Blan        | 3/1/2016 1       | 2016 03 01_BC1 PQ Control SAMPLES_211-278_FM. | 0.00                       | 0.00                  | 19300.                |
| 15 | BLANK          | Blan        | 3/1/2016 1       | 2016 03 01_BC1 PQ Control SAMPLES_211-278_FM. | 0.00                       | 0.00                  | 19800.                |
| 16 | DOUBLE BLANK   | Dou         | 3/1/2016 1       | 2016 03 01_BC1 PQ Control SAMPLES_211-278_FM. | 0.00                       | 0.00                  | 0.00                  |
| 17 | PQ STD 1       | Sta         | 3/1/2016 1       | 2016 03 01_BC1 PQ Control SAMPLES_211-278_FM. | 6350.                      | 10.0                  | 22700.                |
| 18 | PQ STD 2       | Sta         | 3/1/2016 1       | 2016 03 01_BC1 PQ Control SAMPLES_211-278_FM. | 15700.                     | 25.0                  | 22300.                |
| 19 | PQ STD 3       | Sta         | 3/1/2016 1       | 2016 03 01_BC1 PQ Control SAMPLES_211-278_FM. | 31200.                     | 50.0                  | 23000.                |
| 20 | PQ STD 4       | Sta         | 3/1/2016 1       | 2016 03 01_BC1 PQ Control SAMPLES_211-278_FM. | 62400.                     | 100.                  | 23600.                |
| 21 | PQ STD 5       | Sta         | 3/1/2016 1       | 2016 03 01_BC1 PQ Control SAMPLES_211-278_FM. | 155000.                    | 250.                  | 23700.                |
| 22 | PQ STD 6       | Sta         | 3/1/2016 1       | 2016 03 01_BC1 PQ Control SAMPLES_211-278_FM. | 295000.                    | 500.                  | 22400.                |
| 23 | PQ STD 7       | Sta         | 3/1/2016 1       | 2016 03 01_BC1 PQ Control SAMPLES_211-278_FM. | 619000.                    | 1000.                 | 23500.                |
| 24 | DOUBLE BLANK   | Dou         | 3/1/2016 1       | 2016 03 01_BC1 PQ Control SAMPLES_211-278_FM. | 1070.                      | 0.00                  | 0.00                  |
| 25 | PQ QC LOW 1    | Qua         | 3/1/2016 1       | 2016 03 01_BC1 PQ Control SAMPLES_211-278_FM. | 20800.                     | 30.0                  | 24000.                |
| 26 | PQ QC MEDIUM 1 | Qua         | 3/1/2016 1       | 2016 03 01_BC1 PQ Control SAMPLES_211-278_FM. | 114000.                    | 200.                  | 21100.                |
| 27 | PQ QC HIGH 1   | Qua         | 3/1/2016 1       | 2016 03 01_BC1 PQ Control SAMPLES_211-278_FM. | 498000.                    | 800.                  | 22000.                |

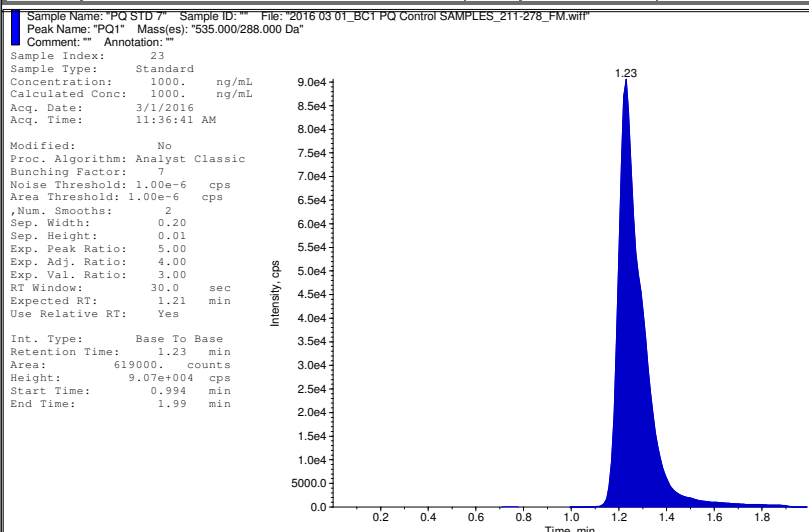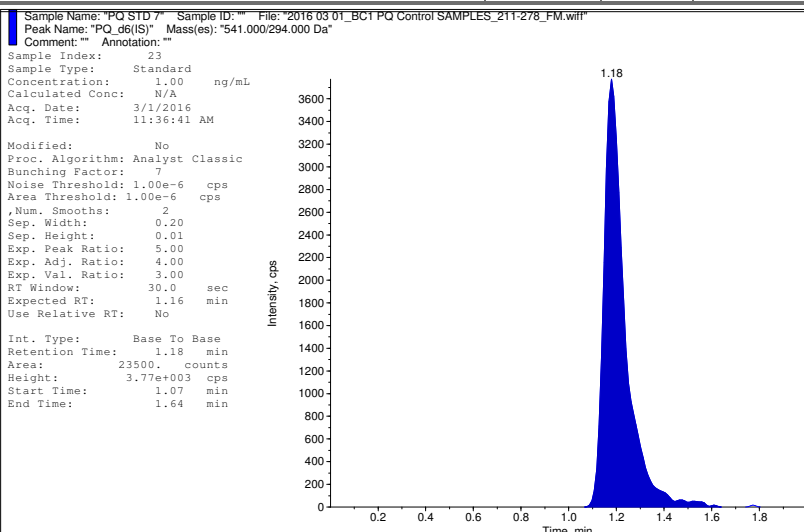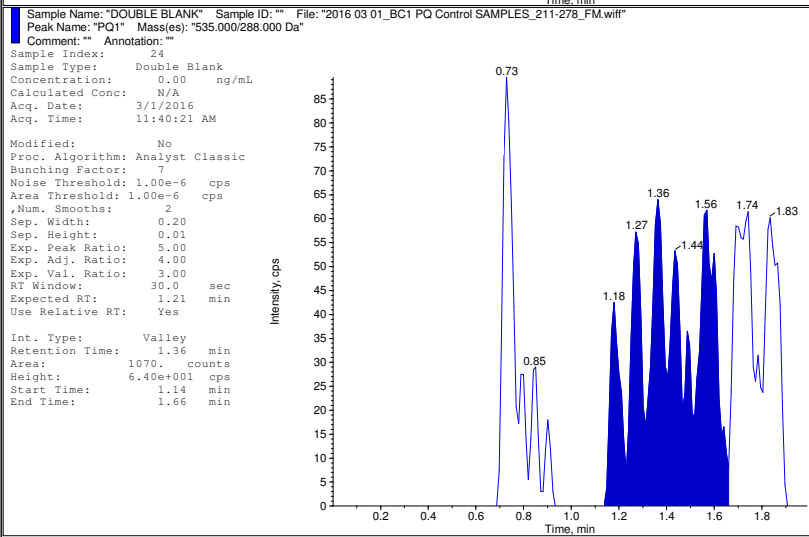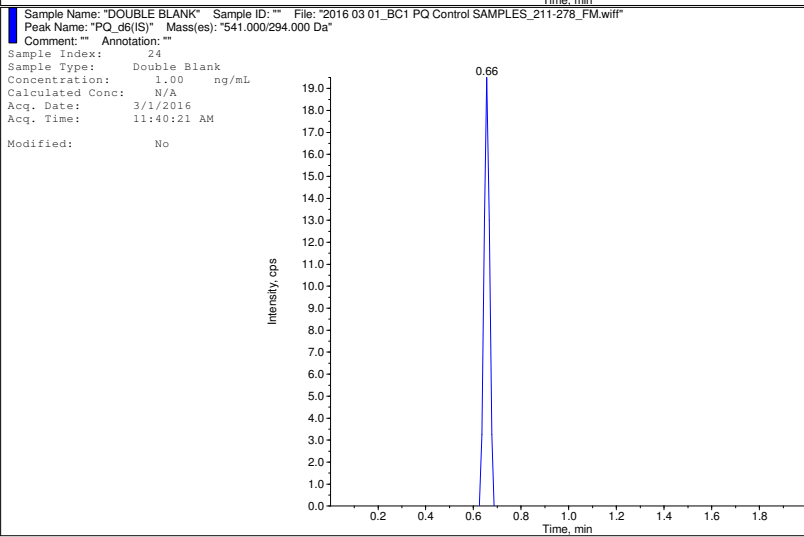

|    | Sample Name        | Sample Type  | Acquisition Date    | File Name                          | Analyte Peak Area (counts) | Analyte Concentration | IS Peak Area (counts) | Use                                 | Rec                      |
|----|--------------------|--------------|---------------------|------------------------------------|----------------------------|-----------------------|-----------------------|-------------------------------------|--------------------------|
| 5  | BLANK              | Blank        | 1/28/2016 6:02:22 P | 2017 01 28_BC1 Children_134-214_VC | 0.00e+000                  | 0.00                  | 5.64e+003             |                                     |                          |
| 6  | DOUBLE BLANK       | Double Blank | 1/28/2016 6:05:57 P | 2017 01 28_BC1 Children_134-214_VC | 0.00e+000                  | 0.00                  | 0.00e+000             |                                     |                          |
| 7  | PQ STD 1           | Standard     | 1/28/2016 6:09:32 P | 2017 01 28_BC1 Children_134-214_VC | 5.16e+003                  | 10.0                  | 5.38e+003             | <input checked="" type="checkbox"/> | <input type="checkbox"/> |
| 8  | PQ STD 2           | Standard     | 1/28/2016 6:13:07 P | 2017 01 28_BC1 Children_134-214_VC | 1.42e+004                  | 25.0                  | 5.82e+003             | <input checked="" type="checkbox"/> | <input type="checkbox"/> |
| 9  | PQ STD 3           | Standard     | 1/28/2016 6:16:42 P | 2017 01 28_BC1 Children_134-214_VC | 2.60e+004                  | 50.0                  | 5.32e+003             | <input checked="" type="checkbox"/> | <input type="checkbox"/> |
| 10 | PQ STD 4           | Standard     | 1/28/2016 6:20:22 P | 2017 01 28_BC1 Children_134-214_VC | 5.02e+004                  | 100.                  | 5.66e+003             | <input checked="" type="checkbox"/> | <input type="checkbox"/> |
| 11 | PQ STD 5           | Standard     | 1/28/2016 6:24:02 P | 2017 01 28_BC1 Children_134-214_VC | 1.30e+005                  | 250.                  | 5.81e+003             | <input checked="" type="checkbox"/> | <input type="checkbox"/> |
| 12 | PQ STD 6           | Standard     | 1/28/2016 6:27:42 P | 2017 01 28_BC1 Children_134-214_VC | 2.46e+005                  | 500.                  | 5.41e+003             | <input checked="" type="checkbox"/> | <input type="checkbox"/> |
| 13 | PQ STD 7           | Standard     | 1/28/2016 6:31:22 P | 2017 01 28_BC1 Children_134-214_VC | 4.78e+005                  | 1000.                 | 5.53e+003             | <input checked="" type="checkbox"/> | <input type="checkbox"/> |
| 14 | DOUBLE BLANK       | Double Blank | 1/28/2016 6:35:02 P | 2017 01 28_BC1 Children_134-214_VC | 4.26e+002                  | 0.00                  | 0.00e+000             |                                     |                          |
| 15 | PQ QC LOW 1        | Quality      | 1/28/2016 6:38:37 P | 2017 01 28_BC1 Children_134-214_VC | 1.62e+004                  | 30.0                  | 5.77e+003             | <input checked="" type="checkbox"/> | <input type="checkbox"/> |
| 16 | PQ QC MEDIUM 1     | Quality      | 1/28/2016 6:42:12 P | 2017 01 28_BC1 Children_134-214_VC | 1.11e+005                  | 200.                  | 5.77e+003             | <input checked="" type="checkbox"/> | <input type="checkbox"/> |
| 17 | PQ QC HIGH 1       | Quality      | 1/28/2016 6:45:47 P | 2017 01 28_BC1 Children_134-214_VC | 4.24e+005                  | 800.                  | 5.62e+003             | <input checked="" type="checkbox"/> | <input type="checkbox"/> |
| 18 | DOUBLE BLANK       | Double Blank | 1/28/2016 6:49:22 P | 2017 01 28_BC1 Children_134-214_VC | 1.40e+002                  | 0.00                  | 0.00e+000             |                                     |                          |
| 19 | BC1 Children - 134 | Unknown      | 1/28/2016 6:52:57 P | 2017 01 28_BC1 Children_134-214_VC | 2.04e+004                  | N/A                   | 5.95e+003             |                                     |                          |
| 20 | BC1 Children - 135 | Unknown      | 1/28/2016 6:56:32 P | 2017 01 28_BC1 Children_134-214_VC | 8.18e+004                  | N/A                   | 6.15e+003             |                                     |                          |

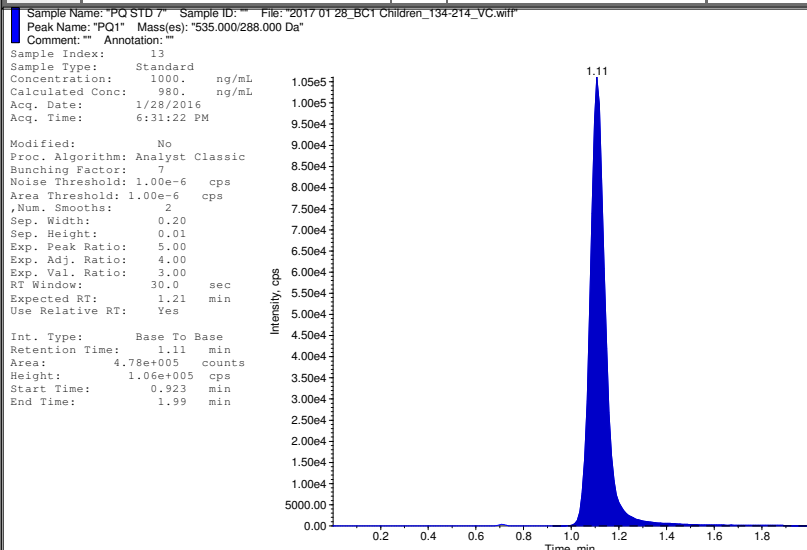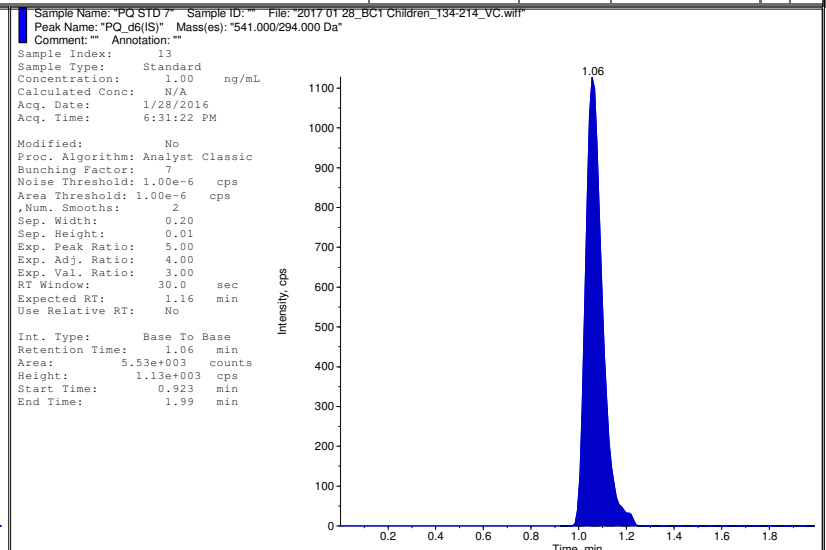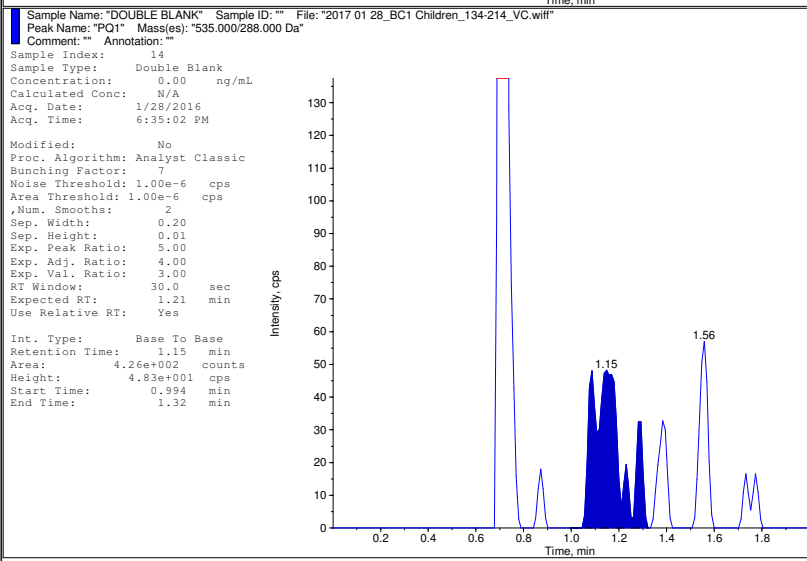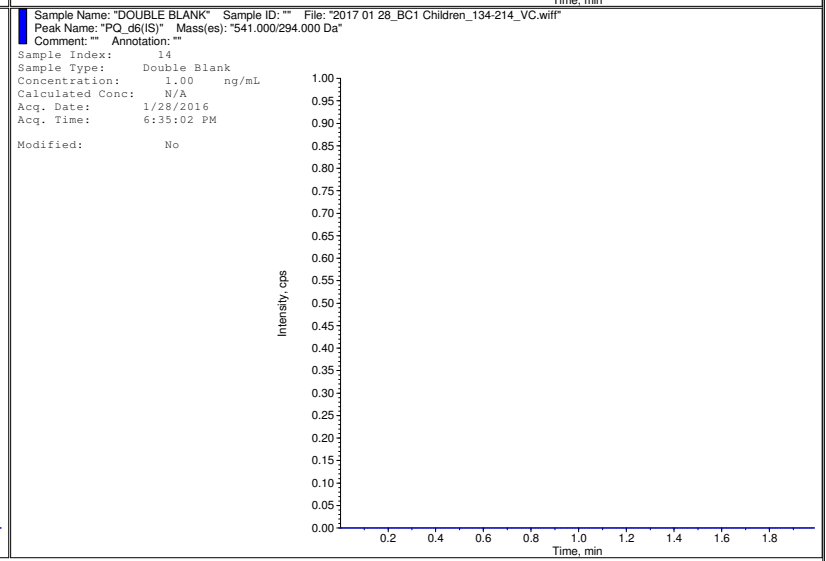

|    | Sample Name    | Sample T | Acquisition Date    | File Name                  | Analyte Peak Area (counts) | Analyte Concentration (ng/mL) | IS Peak Area (counts) | Use R |
|----|----------------|----------|---------------------|----------------------------|----------------------------|-------------------------------|-----------------------|-------|
| 15 | BLANK          | Blan     | 3/7/2017 2:26:24 PM | 2017 03 07_ PQ TEST_FM_AM. | 0.00                       | 0.00                          | 24000.                |       |
| 16 | BLANK          | Blan     | 3/7/2017 2:29:59 PM | 2017 03 07_ PQ TEST_FM_AM. | 0.00                       | 0.00                          | 23800.                |       |
| 17 | DOUBLE BLANK   | Dou      | 3/7/2017 2:33:34 PM | 2017 03 07_ PQ TEST_FM_AM. | 0.00                       | 0.00                          | 0.00                  |       |
| 18 | PQ STD 1       | Unk      | 3/7/2017 2:37:09 PM | 2017 03 07_ PQ TEST_FM_AM. | 1680.                      | N/A                           | 23900.                |       |
| 19 | PQ STD 2       | Unk      | 3/7/2017 2:40:44 PM | 2017 03 07_ PQ TEST_FM_AM. | 4320.                      | N/A                           | 23000.                |       |
| 20 | PQ STD 3       | Unk      | 3/7/2017 2:44:19 PM | 2017 03 07_ PQ TEST_FM_AM. | 8470.                      | N/A                           | 24300.                |       |
| 21 | PQ STD 4       | Unk      | 3/7/2017 2:47:59 PM | 2017 03 07_ PQ TEST_FM_AM. | 17000.                     | N/A                           | 24100.                |       |
| 22 | PQ STD 5       | Unk      | 3/7/2017 2:51:39 PM | 2017 03 07_ PQ TEST_FM_AM. | 42900.                     | N/A                           | 23100.                |       |
| 23 | PQ STD 6       | Unk      | 3/7/2017 2:55:19 PM | 2017 03 07_ PQ TEST_FM_AM. | 90200.                     | N/A                           | 24900.                |       |
| 24 | PQ STD 7       | Unk      | 3/7/2017 2:58:59 PM | 2017 03 07_ PQ TEST_FM_AM. | 177000.                    | N/A                           | 24700.                |       |
| 25 | DOUBLE BLANK   | Unk      | 3/7/2017 3:02:39 PM | 2017 03 07_ PQ TEST_FM_AM. | 29.1                       | N/A                           | 0.00                  |       |
| 26 | DOUBLE BLANK   | Unk      | 3/7/2017 3:06:14 PM | 2017 03 07_ PQ TEST_FM_AM. | 0.00                       | N/A                           | 0.00                  |       |
| 27 | PQ QC LOW 1    | Unk      | 3/7/2017 3:09:50 PM | 2017 03 07_ PQ TEST_FM_AM. | 5770.                      | N/A                           | 24100.                |       |
| 28 | PQ QC MEDIUM 1 | Unk      | 3/7/2017 3:13:24 PM | 2017 03 07_ PQ TEST_FM_AM. | 38300.                     | N/A                           | 24200.                |       |
| 29 | PQ QC HIGH 1   | Unk      | 3/7/2017 3:16:59 PM | 2017 03 07_ PQ TEST_FM_AM. | 148000.                    | N/A                           | 24400.                |       |
| 30 | DOUBLE BLANK   | Dou      | 3/7/2017 3:20:34 PM | 2017 03 07_ PQ TEST_FM_AM. | 0.00                       | 0.00                          | 0.00                  |       |
| 31 | DOUBLE BLANK   | Dou      | 3/7/2017 3:24:10 PM | 2017 03 07_ PQ TEST_FM_AM. | 0.00                       | 0.00                          | 0.00                  |       |

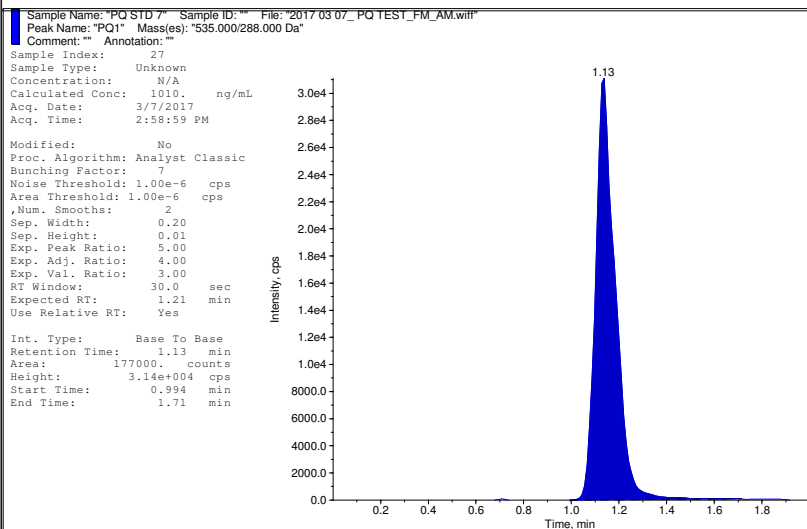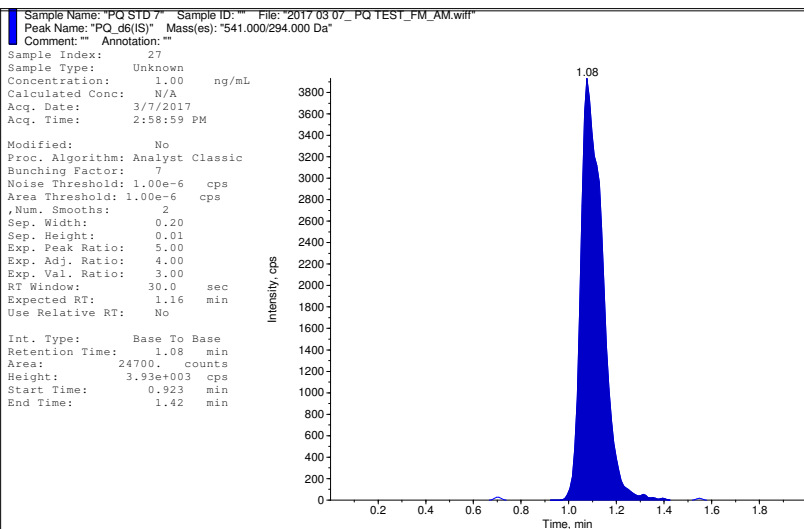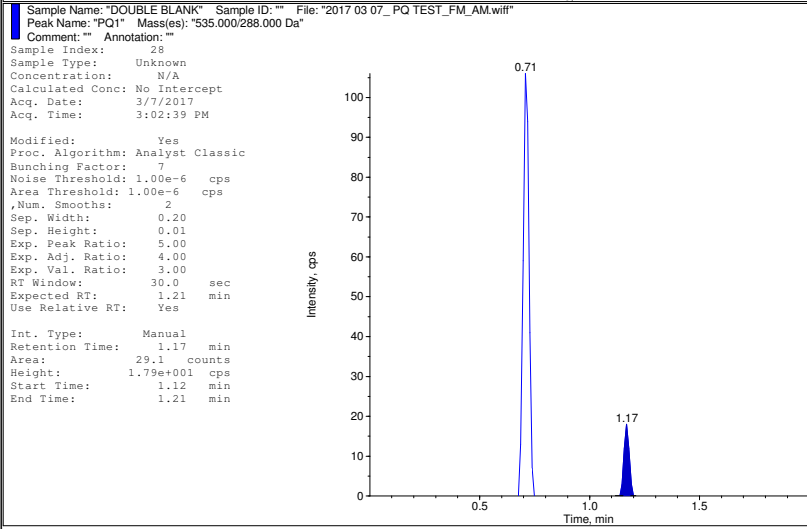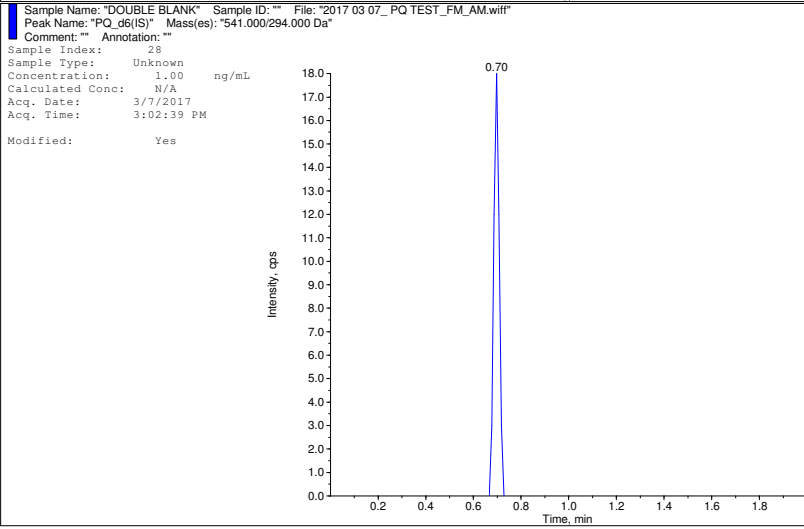

Supplement: pone.0233893.s008.pdf [file pone.0233893.s008.pdf]
