# Supplementary material for: Determination of piperaquine concentration in human plasma and the correlation of capillary versus venous plasma concentrations
Source: PubMed Central journal article supplement (PMC7259774; doi:10.1371/journal.pone.0233893), 2020-05-29
Supplement: pone.0233893.s007.pdf [file pone.0233893.s007.pdf]

|    | Sample Name | Sample Type | File Name   | Analyte Peak Area (counts) | Analyte Peak Height (cps) | Analyte Conc | Analyte Ret | IS Peak Area (counts) | IS Peak Height (cps) | Use                                 | Rec                                 | Calculate Co | Accuracy (%) |
|----|-------------|-------------|-------------|----------------------------|---------------------------|--------------|-------------|-----------------------|----------------------|-------------------------------------|-------------------------------------|--------------|--------------|
| 3  | Blk2        | Blar        | 60209PQVald | 9.86e+003                  | 9.95e+002                 | 0.00         | 1.44        | 9.37e+006             | 3.14e+005            | <input type="checkbox"/>            | <input checked="" type="checkbox"/> | N/A          | N/A          |
| 4  | STD1        | Sta         | 60209PQVald | 7.58e+004                  | 7.22e+003                 | 20.0         | 1.36        | 5.71e+006             | 2.01e+005            | <input checked="" type="checkbox"/> | <input type="checkbox"/>            | 20.9         | 105.         |
| 5  | STD2        | Sta         | 60209PQVald | 1.81e+005                  | 1.78e+004                 | 50.0         | 1.35        | 5.92e+006             | 2.03e+005            | <input checked="" type="checkbox"/> | <input type="checkbox"/>            | 44.3         | 88.5         |
| 6  | STD3        | Sta         | 60209PQVald | 3.94e+005                  | 3.92e+004                 | 100.         | 1.34        | 6.30e+006             | 2.19e+005            | <input checked="" type="checkbox"/> | <input type="checkbox"/>            | 87.2         | 87.2         |
| 7  | STD4        | Sta         | 60209PQVald | 8.69e+005                  | 8.39e+004                 | 200.         | 1.34        | 5.41e+006             | 2.02e+005            | <input checked="" type="checkbox"/> | <input type="checkbox"/>            | 219.         | 110.         |
| 8  | STD5        | Sta         | 60209PQVald | 2.19e+006                  | 2.19e+005                 | 500.         | 1.33        | 5.75e+006             | 2.10e+005            | <input checked="" type="checkbox"/> | <input type="checkbox"/>            | 516.         | 103.         |
| 9  | STD6        | Sta         | 60209PQVald | 3.28e+006                  | 2.99e+005                 | 750.         | 1.32        | 5.68e+006             | 2.04e+005            | <input checked="" type="checkbox"/> | <input type="checkbox"/>            | 780.         | 104.         |
| 10 | STD7        | Sta         | 60209PQVald | 4.05e+006                  | 3.47e+005                 | 1000.        | 1.31        | 5.87e+006             | 2.03e+005            | <input checked="" type="checkbox"/> | <input type="checkbox"/>            | 930.         | 93.0         |
| 11 | D blk       | Dou         | 60209PQVald | 1.02e+004                  | 5.54e+002                 | 0.00         | 1.44        | 1.58e+003             | 1.89e+002            | <input type="checkbox"/>            | <input checked="" type="checkbox"/> | N/A          | N/A          |
| 12 | LOQ1        | Qua         | 60209PQVald | 7.74e+004                  | 7.43e+003                 | 20.0         | 1.36        | 5.82e+006             | 2.09e+005            | <input checked="" type="checkbox"/> | <input type="checkbox"/>            | 20.9         | 105.         |
| 13 | LOQ2        | Qua         | 60209PQVald | 7.94e+004                  | 7.26e+003                 | 20.0         | 1.36        | 5.82e+006             | 2.02e+005            | <input checked="" type="checkbox"/> | <input type="checkbox"/>            | 21.4         | 107.         |
| 14 | LOQ3        | Qua         | 60209PQVald | 7.97e+004                  | 7.46e+003                 | 20.0         | 1.35        | 5.56e+006             | 1.92e+005            | <input checked="" type="checkbox"/> | <input type="checkbox"/>            | 22.3         | 112.         |
| 15 | LOQ4        | Qua         | 60209PQVald | 7.92e+004                  | 7.32e+003                 | 20.0         | 1.36        | 5.59e+006             | 1.94e+005            | <input checked="" type="checkbox"/> | <input type="checkbox"/>            | 22.1         | 111.         |
| 16 | LOQ5        | Qua         | 60209PQVald | 7.47e+004                  | 7.25e+003                 | 20.0         | 1.35        | 5.26e+006             | 1.91e+005            | <input checked="" type="checkbox"/> | <input type="checkbox"/>            | 22.2         | 111.         |
| 17 | L1          | Qua         | 60209PQVald | 1.13e+005                  | 1.05e+004                 | 30.0         | 1.35        | 5.48e+006             | 1.96e+005            | <input checked="" type="checkbox"/> | <input type="checkbox"/>            | 30.7         | 102.         |
| 18 | L2          | Qua         | 60209PQVald | 1.10e+005                  | 1.11e+004                 | 30.0         | 1.36        | 5.55e+006             | 1.99e+005            | <input checked="" type="checkbox"/> | <input type="checkbox"/>            | 29.8         | 99.4         |
| 19 | L3          | Qua         | 60209PQVald | 1.10e+005                  | 1.07e+004                 | 30.0         | 1.36        | 5.61e+006             | 1.94e+005            | <input checked="" type="checkbox"/> | <input type="checkbox"/>            | 29.5         | 98.4         |
| 20 | L4          | Qua         | 60209PQVald | 1.13e+005                  | 1.08e+004                 | 30.0         | 1.35        | 5.69e+006             | 1.96e+005            | <input checked="" type="checkbox"/> | <input type="checkbox"/>            | 29.7         | 99.1         |
| 21 | L5          | Qua         | 60209PQVald | 1.11e+005                  | 1.10e+004                 | 30.0         | 1.35        | 5.58e+006             | 1.91e+005            | <input checked="" type="checkbox"/> | <input type="checkbox"/>            | 29.8         | 99.4         |
| 22 | M1          | Qua         | 60209PQVald | 1.23e+006                  | 1.21e+005                 | 300.         | 1.32        | 5.74e+006             | 1.95e+005            | <input checked="" type="checkbox"/> | <input type="checkbox"/>            | 291.         | 97.0         |
| 23 | M2          | Qua         | 60209PQVald | 1.23e+006                  | 1.28e+005                 | 300.         | 1.32        | 5.79e+006             | 1.98e+005            | <input checked="" type="checkbox"/> | <input type="checkbox"/>            | 290.         | 96.5         |

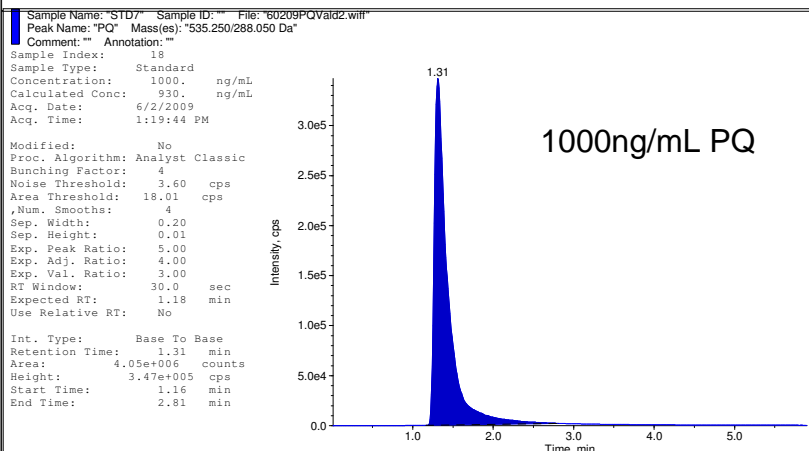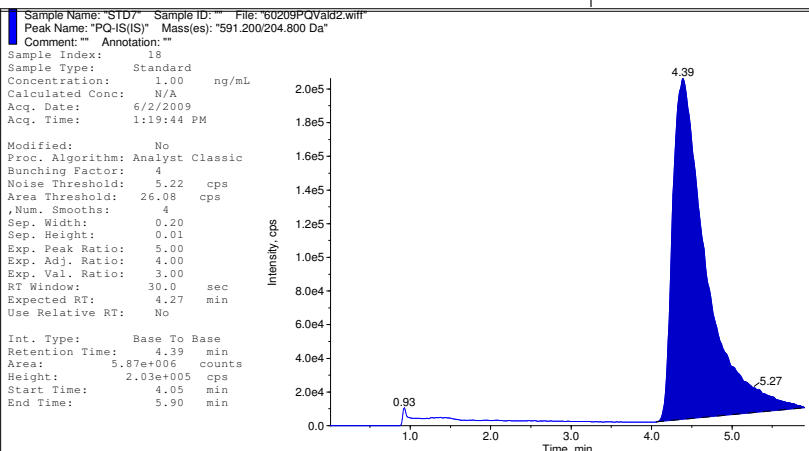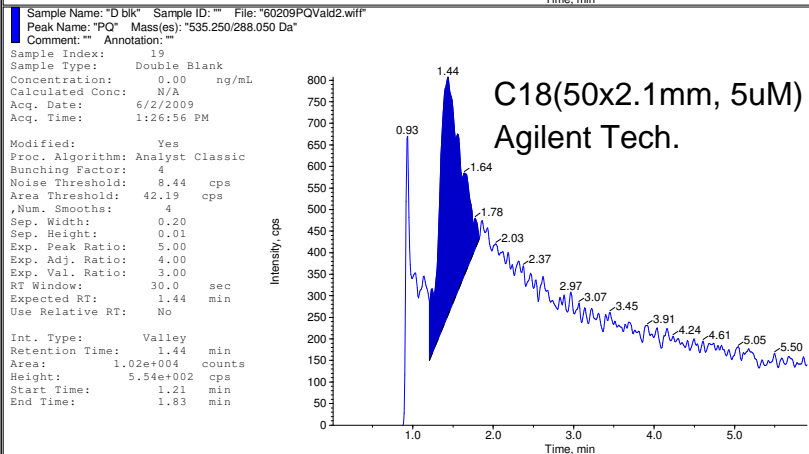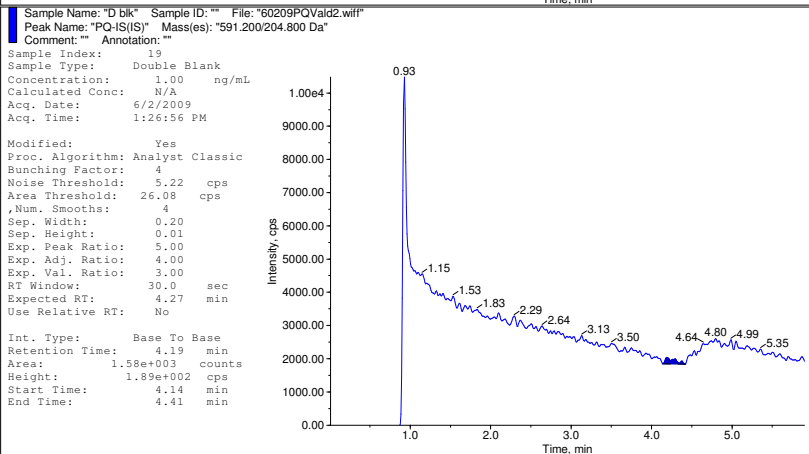

Mobile phase solvent: 2.5mM NH4HCO3-MeOH (1:4, v/v); ref: Lee et al. Xenobiotica, 2012, 42(11):1088-95.

|    | Sample Name | Sample T | Acquisition Date    | Vial Po | File Name             | Analyte Peak | Analyte Peak Area (counts) | Analyte Concentration | IS Peak Area (counts) | Use                                 | Record                   | Calculated Concentration | Relative Retention Time | Accuracy (%) |
|----|-------------|----------|---------------------|---------|-----------------------|--------------|----------------------------|-----------------------|-----------------------|-------------------------------------|--------------------------|--------------------------|-------------------------|--------------|
| 7  | blk         | Blan     | 9/13/2013 5:26:57 P | 2       | 2013 913PQvalid2.wiff | PQ1          | 2.67e+003                  | 0.00                  | 1.39e+004             | <input type="checkbox"/>            | <input type="checkbox"/> | N/A                      | 1.01                    | N/A          |
| 8  | STD0.5ng    | Unk      | 9/13/2013 5:30:21 P | 3       | 2013 913PQvalid2.wiff | PQ1          | 7.45e+003                  | N/A                   | 1.44e+004             | <input type="checkbox"/>            | <input type="checkbox"/> | 0.502                    | 1.01                    | N/A          |
| 9  | STD1ng      | Stan     | 9/13/2013 5:33:45 P | 4       | 2013 913PQvalid2.wiff | PQ1          | 1.40e+004                  | 1.00                  | 1.41e+004             | <input checked="" type="checkbox"/> | <input type="checkbox"/> | 1.01                     | 1.01                    | 101.         |
| 10 | STD1.5ng    | Stan     | 9/13/2013 5:37:08 P | 5       | 2013 913PQvalid2.wiff | PQ1          | 2.12e+004                  | 1.50                  | 1.47e+004             | <input checked="" type="checkbox"/> | <input type="checkbox"/> | 1.48                     | 1.01                    | 98.5         |
| 11 | STD5ng      | Stan     | 9/13/2013 5:40:33 P | 6       | 2013 913PQvalid2.wiff | PQ1          | 6.74e+004                  | 5.00                  | 1.43e+004             | <input checked="" type="checkbox"/> | <input type="checkbox"/> | 4.91                     | 1.01                    | 98.3         |
| 12 | STD10ng     | Stan     | 9/13/2013 5:43:57 P | 7       | 2013 913PQvalid2.wiff | PQ1          | 1.41e+005                  | 10.0                  | 1.44e+004             | <input checked="" type="checkbox"/> | <input type="checkbox"/> | 10.2                     | 1.00                    | 102.         |
| 13 | STD25ng     | Stan     | 9/13/2013 5:47:21 P | 8       | 2013 913PQvalid2.wiff | PQ1          | 3.55e+005                  | 25.0                  | 1.43e+004             | <input checked="" type="checkbox"/> | <input type="checkbox"/> | 26.0                     | 1.01                    | 104.         |
| 14 | STD50ng     | Stan     | 9/13/2013 5:50:45 P | 9       | 2013 913PQvalid2.wiff | PQ1          | 6.89e+005                  | 50.0                  | 1.46e+004             | <input checked="" type="checkbox"/> | <input type="checkbox"/> | 49.6                     | 1.01                    | 99.2         |
| 15 | STD100ng    | Stan     | 9/13/2013 5:54:10 P | 10      | 2013 913PQvalid2.wiff | PQ1          | 1.45e+006                  | 100.                  | 1.45e+004             | <input checked="" type="checkbox"/> | <input type="checkbox"/> | 105.                     | 1.01                    | 105.         |
| 16 | STD250ng    | Stan     | 9/13/2013 5:57:34 P | 11      | 2013 913PQvalid2.wiff | PQ1          | 3.60e+006                  | 250.                  | 1.52e+004             | <input checked="" type="checkbox"/> | <input type="checkbox"/> | 250.                     | 1.01                    | 99.9         |
| 17 | Dbk         | Unk      | 9/13/2013 6:00:57 P | 1       | 2013 913PQvalid2.wiff | PQ1          | 2.81e+003                  | N/A                   | 8.81e+001             | <input type="checkbox"/>            | <input type="checkbox"/> | 33.6                     | 0.823                   | N/A          |
| 18 | 1ng1        | Qual     | 9/13/2013 6:04:18 P | 12      | 2013 913PQvalid2.wiff | PQ1          | 1.67e+004                  | 1.00                  | 1.43e+004             | <input checked="" type="checkbox"/> | <input type="checkbox"/> | 1.18                     | 1.01                    | 118.         |
| 19 | 1ng2        | Qual     | 9/13/2013 6:07:42 P | 13      | 2013 913PQvalid2.wiff | PQ1          | 1.34e+004                  | 1.00                  | 1.44e+004             | <input checked="" type="checkbox"/> | <input type="checkbox"/> | 0.938                    | 1.00                    | 93.8         |
| 20 | 1ng3        | Qual     | 9/13/2013 6:11:06 P | 14      | 2013 913PQvalid2.wiff | PQ1          | 1.45e+004                  | 1.00                  | 1.47e+004             | <input checked="" type="checkbox"/> | <input type="checkbox"/> | 0.997                    | 1.01                    | 99.7         |
| 21 | 1ng4        | Qual     | 9/13/2013 6:14:30 P | 15      | 2013 913PQvalid2.wiff | PQ1          | 1.40e+004                  | 1.00                  | 1.40e+004             | <input checked="" type="checkbox"/> | <input type="checkbox"/> | 1.01                     | 1.00                    | 101.         |

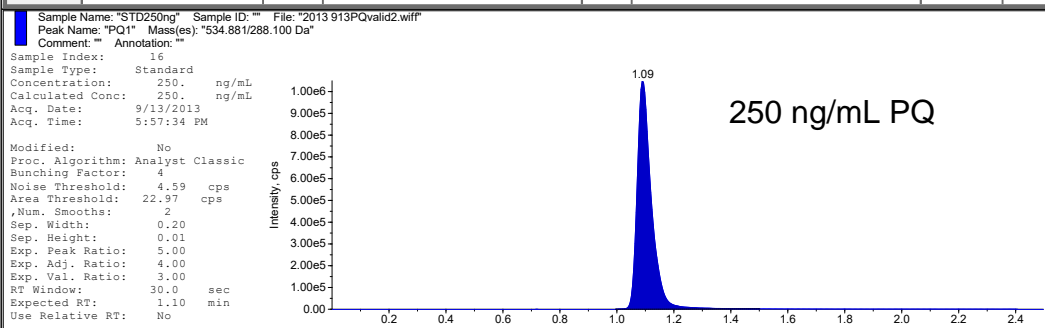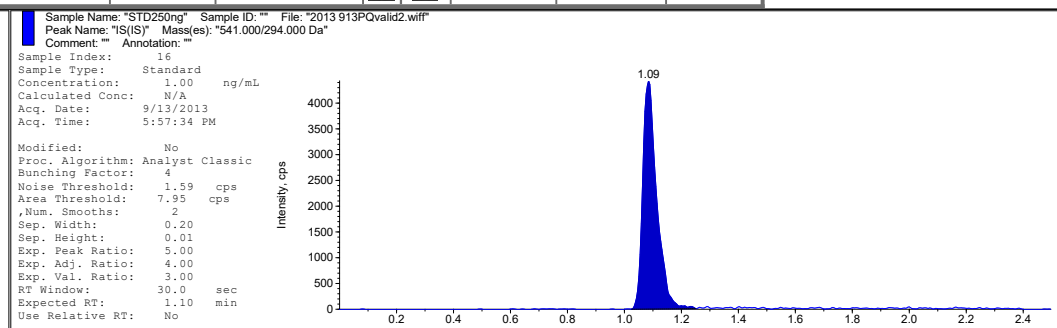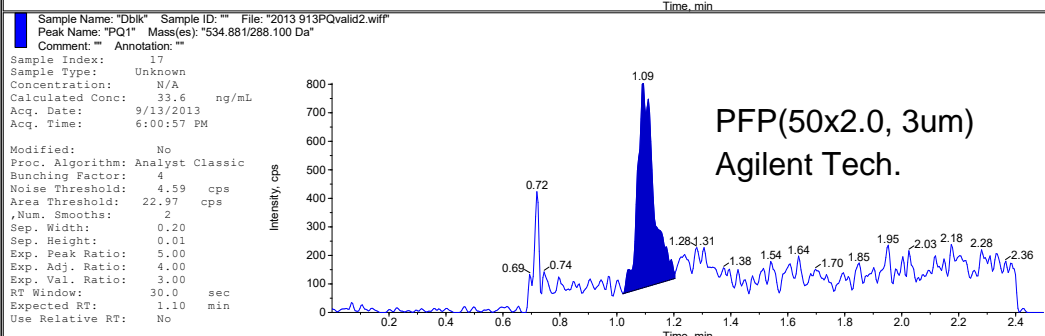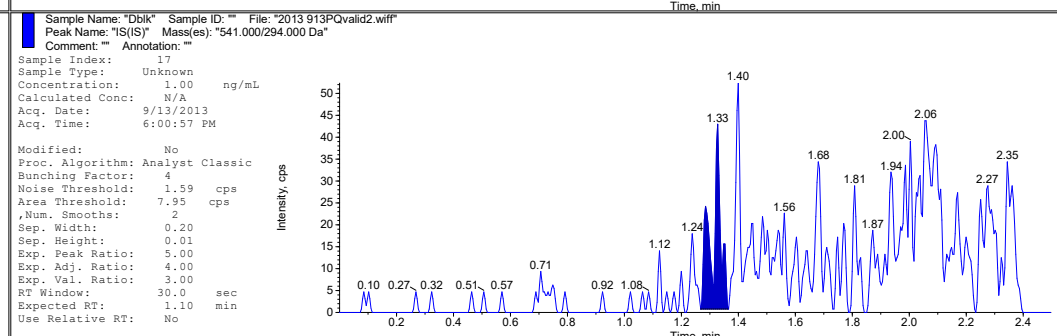

Collected by: N/A  
 Electronic Signature: no  
 Operator: Drug Research Unit

MPA: 20mMNH4FA 0.14%TFA,MPB: 0.1%TFA in MeCN; Ref: Kjellin et al. Bioanalysis, 2014, 6(23): 3081-89.

|    | Sample Name | Sample Type | Acquisition Date     | Vial Position | File Name        | Analyte Peak | Analyte Peak Area (counts) | Analyte Concentration | IS Peak Area (counts) | Use Record                          | Calculated Concentration | Relative Retention Time | Accuracy (%) |
|----|-------------|-------------|----------------------|---------------|------------------|--------------|----------------------------|-----------------------|-----------------------|-------------------------------------|--------------------------|-------------------------|--------------|
| 26 | STD2        | Stan        | 5/29/2015 11:51:28 A | 9             | 2015 5_29newrang | PQ1          | 8.66e+003                  | 1.00                  | 1.50e+004             | <input checked="" type="checkbox"/> | 0.992                    | 1.01                    | 99.2         |
| 27 | STD3        | Stan        | 5/29/2015 11:55:04 A | 10            | 2015 5_29newrang | PQ1          | 1.30e+004                  | 1.50                  | 1.65e+004             | <input checked="" type="checkbox"/> | 1.41                     | 1.00                    | 93.9         |
| 28 | STD4        | Stan        | 5/29/2015 11:58:47 A | 11            | 2015 5_29newrang | PQ1          | 4.66e+004                  | 5.00                  | 1.65e+004             | <input checked="" type="checkbox"/> | 5.47                     | 0.996                   | 109.         |
| 29 | STD5        | Stan        | 5/29/2015 12:02:26 P | 12            | 2015 5_29newrang | PQ1          | 9.23e+004                  | 10.0                  | 1.63e+004             | <input checked="" type="checkbox"/> | 11.1                     | 1.01                    | 111.         |
| 30 | STD6        | Stan        | 5/29/2015 12:06:06 P | 13            | 2015 5_29newrang | PQ1          | 2.25e+005                  | 25.0                  | 1.71e+004             | <input checked="" type="checkbox"/> | 26.2                     | 1.01                    | 105.         |
| 31 | STD7        | Stan        | 5/29/2015 12:09:44 P | 14            | 2015 5_29newrang | PQ1          | 4.33e+005                  | 50.0                  | 1.82e+004             | <input checked="" type="checkbox"/> | 47.4                     | 1.01                    | 94.8         |
| 32 | Dbk1        | Dou         | 5/29/2015 12:13:19 P | 6             | 2015 5_29newrang | PQ1          | 9.75e+002                  | 0.00                  | 7.98e+001             | <input type="checkbox"/>            | N/A                      | 1.01                    | N/A          |
| 33 | LOQ1        | Qual        | 5/29/2015 12:16:59 P | 15            | 2015 5_29newrang | PQ1          | 6.05e+003                  | 0.500                 | 1.66e+004             | <input checked="" type="checkbox"/> | 0.570                    | 1.01                    | 114.         |
| 34 | LOQ2        | Qual        | 5/29/2015 12:20:38 P | 16            | 2015 5_29newrang | PQ1          | 5.64e+003                  | 0.500                 | 1.65e+004             | <input checked="" type="checkbox"/> | 0.522                    | 1.01                    | 104.         |

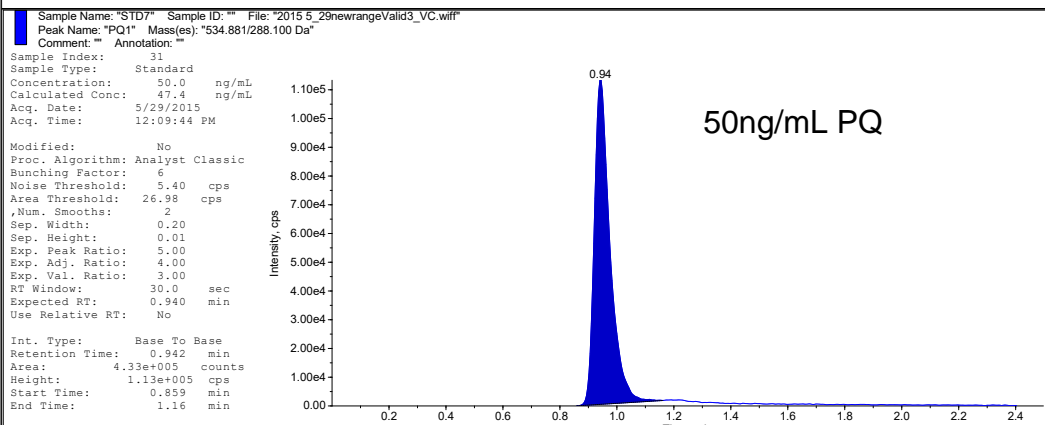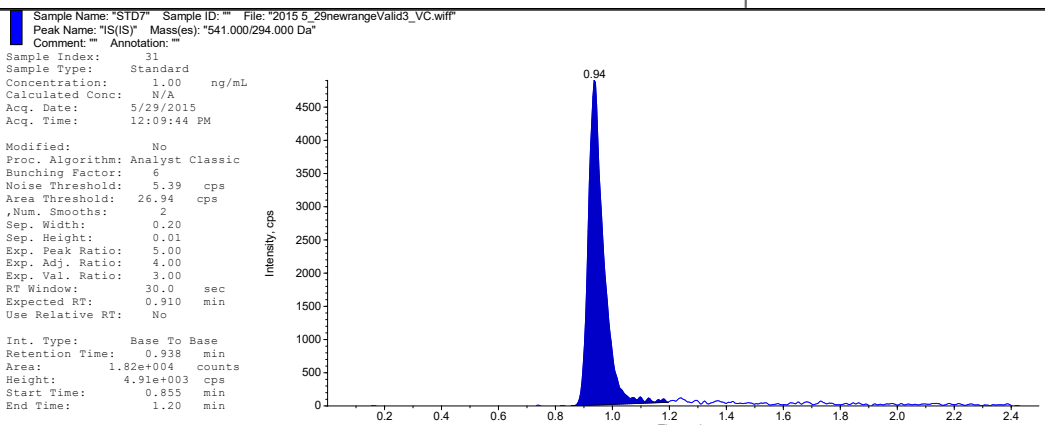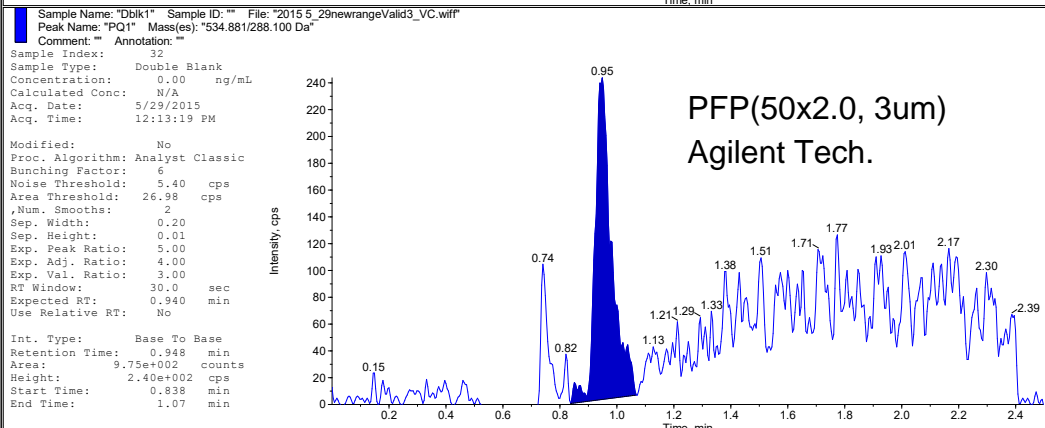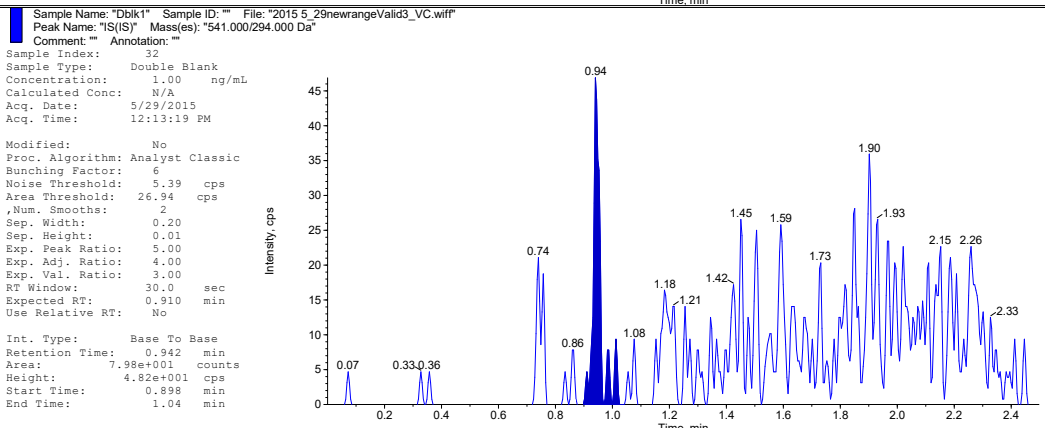

Collected by: N/A  
 Electronic Signature: no  
 Operator: Drug Research Unit

MPA: 20mMNH4FA 0.14%TFA,MPB: 0.1%TFA in MeCN; Ref: Kjellin et al. Bioanalysis, 2014, 6(23): 3081-89.
